# Supplementary material for: Identification of functionality of heteroatoms in boron, nitrogen and fluorine ternary-doped carbon as a robust electrocatalyst for nitrogen reduction reaction powered by rechargeable zinc–air batteries
Source: Royal Society of Chemistry journal article supplement (doi:10.1039/d0ta01572e), 2020-01-01
Supplement: d0ta01572e1.pdf [file d0ta01572e1.pdf]

## Supporting information

for

### **Identification of functionality of heteroatoms in boron, nitrogen and fluorine ternary doped carbon as robust nitrogen fixation electrocatalyst powered by zinc-air batteries**

Quan Zhang<sup>a#</sup>, Fang Luo<sup>a#</sup>, Ying Ling<sup>a</sup>, Shenglin Xiao<sup>a</sup>, Min Li<sup>a</sup>, Konggang Qu<sup>b</sup>,  
Yangang Wang<sup>c\*</sup>, Jingxiang Xu<sup>c\*</sup>, Weiwei Cai<sup>a\*</sup> and Zehui Yang<sup>a\*</sup>

<sup>a</sup>Sustainable Energy Laboratory, Faculty of Materials Science and Chemistry,  
China University of Geosciences Wuhan, 388 Lumo RD, Wuhan, 430074,  
China

<sup>b</sup>Chemistry and Chemical Engineering, Liaocheng University, Liaocheng,  
252059, China

<sup>c</sup>College of Biological Chemical Science and Engineering, Jiaxing University,  
Jiaxing 314001, China.

<sup>d</sup>College of Engineering Science and Technology, Shanghai Ocean University,  
Shanghai 201306, China

**Table S1** Quantitative analysis of BNFC-700, BNFC-800 and BNFC-900 electrocatalysts.

| Electrocatalyst | B1s                       | N1s                 | F1s              |
|-----------------|---------------------------|---------------------|------------------|
| BNFC-700        | B <sub>4</sub> C:1.88%    | B-N: 10.36%         | Ionic C-F:49.37% |
|                 | BC <sub>3</sub> : 25.82%  | Pyridinic N :28.94% | C-F:23.91%       |
|                 | BC <sub>2</sub> O: 54.21% | Pyrrolic N: 38.67%  | Semi-ionic       |
|                 | BCO <sub>2</sub> : 14.34% | Graphitic N:9.37%   | C-F:26.72%       |
|                 | B-N: 3.75%                | Oxidized N:12.66%   |                  |
| BNFC-800        | B <sub>4</sub> C:14.20%   | B-N: 5.33%          | Ionic C-F:17.01% |
|                 | BC <sub>3</sub> :37.56%   | Pyridinic N: 29.67% | C-F:56.81%       |
|                 | BC <sub>2</sub> O:29.72%  | Pyrrolic N: 29.02%  | Semi-ionic       |
|                 | BCO <sub>2</sub> :10.68%  | Graphitic N:22.45%  | C-F:26.18%       |
|                 | B-N: 7.84%                | Oxidized N:13.53%   |                  |
| BNFC-900        | B <sub>4</sub> C:12.95%   | B-N: 10.24%         | Ionic C-F:48.9%  |
|                 | BC <sub>3</sub> :22.82%   | Pyridinic N:21.44%  | C-F:9.12%        |
|                 | BC <sub>2</sub> O:29.50%  | Pyrrolic N: 24.15%  | Semi-ionic       |
|                 | BCO <sub>2</sub> :30.05%  | Graphitic N:27.53%  | C-F:41.98%       |
|                 | B-N: 4.68%                | Oxidized N:16.64%   |                  |

**Table S2** Quantitative analysis of BNFC-800 electrocatalysts before and after stability test.

| Electrocatalyst                                                            | B1s                      | N1s                 | F1s              |
|----------------------------------------------------------------------------|--------------------------|---------------------|------------------|
| BNFC-800                                                                   | B <sub>4</sub> C:14.20%  | B-N: 5.33%          | Ionic C-F:17.01% |
|                                                                            | BC <sub>3</sub> :37.56%  | Pyridinic N: 29.67% | C-F:56.81%       |
|                                                                            | BC <sub>2</sub> O:29.72% | Pyrrolic N: 29.02%  | Semi-ionic       |
|                                                                            | BCO <sub>2</sub> :10.68% | Graphitic N:22.45%  | C-F:26.18%       |
|                                                                            | B-N: 7.84%               | Oxidized N:13.53%   |                  |
| BNFC-800 after 10 h NRR catalysis in 0.05 M H <sub>2</sub> SO <sub>4</sub> | B <sub>4</sub> C:15.08%  | B-N: 5.39%          | Ionic C-F:17.89% |
|                                                                            | BC <sub>3</sub> :37.76%  | Pyridinic N: 30.42% | C-F:57.60%       |
|                                                                            | BC <sub>2</sub> O:28.13% | Pyrrolic N: 28.84%  | Semi-ionic       |
|                                                                            | BCO <sub>2</sub> :11.41% | Graphitic N:22.59%  | C-F:24.51%       |
|                                                                            | B-N: 7.62%               | Oxidized N:12.76%   |                  |
| BNFC-800 after 10 h OER catalysis in 1 M NaOH                              | B <sub>4</sub> C:13.74%  | B-N: 5.16%          | Ionic C-F:18.81% |
|                                                                            | BC <sub>3</sub> :34.79%  | Pyridinic N:29.58%  | C-F:56.76%       |
|                                                                            | BC <sub>2</sub> O:29.68% | Pyrrolic N: 28.64%  | Semi-ionic       |
|                                                                            | BCO <sub>2</sub> :13.97% | Graphitic N:22.70%  | C-F:24.43%       |
|                                                                            | B-N: 7.82%               | Oxidized N:13.92%   |                  |

**Table S3** Quantitative analysis of C, B, N, F elements in BNFC-800 electrocatalyst before and after stability test.

| Element | BNFC-800 | BNFC-800 after 10 h NRR catalysis in 0.05 M H <sub>2</sub> SO <sub>4</sub> | BNFC-800 after 10 h OER catalysis in 1 M NaOH |
|---------|----------|----------------------------------------------------------------------------|-----------------------------------------------|
| B       | 1.31%    | 1.26%                                                                      | 1.21%                                         |
| N       | 5.79%    | 5.62%                                                                      | 5.73%                                         |
| F       | 1.01%    | 0.94%                                                                      | 0.92%                                         |

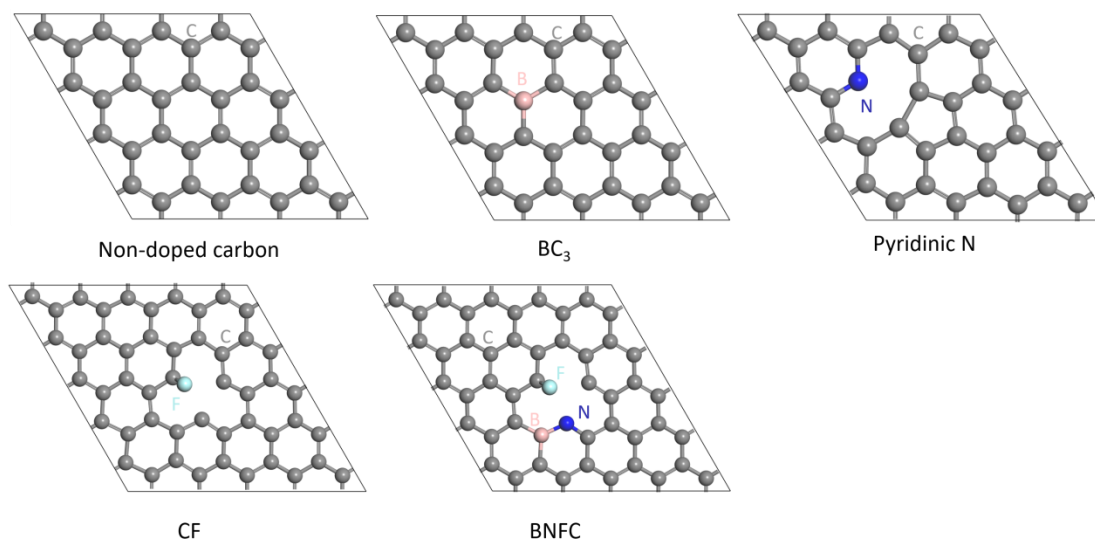

**Figure S1** DFT calculated models of non-doped carbon, pyridinic N, BC<sub>3</sub>, F doped carbon (FC) and B, N, F ternary doped carbon.

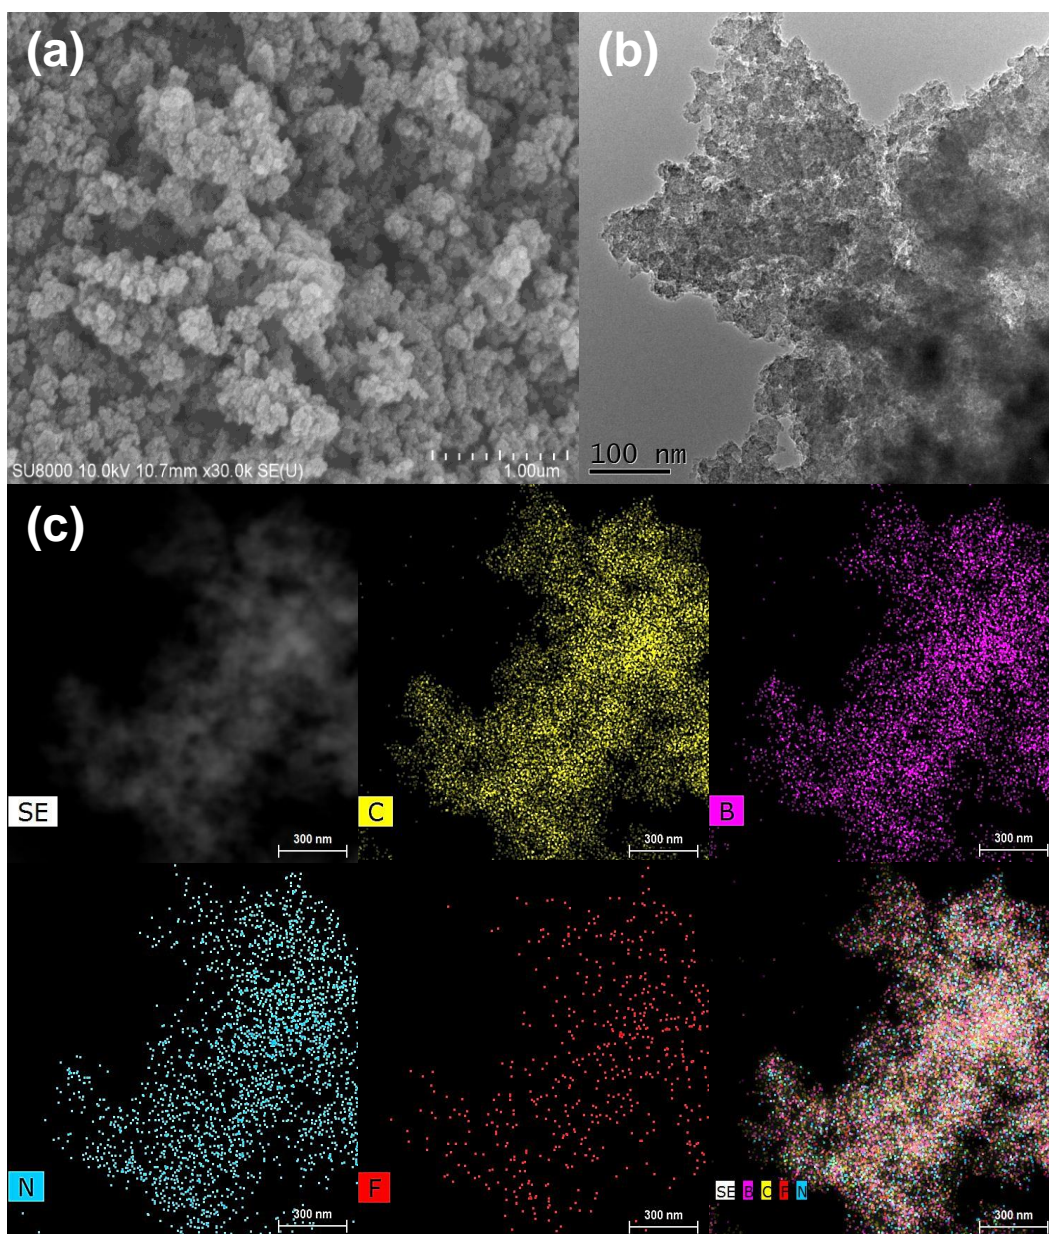

**Figure S2** SEM (a), TEM (b), HAADF-STEM (c) images and relative EDS mappings of BNFC-700 electrocatalyst.



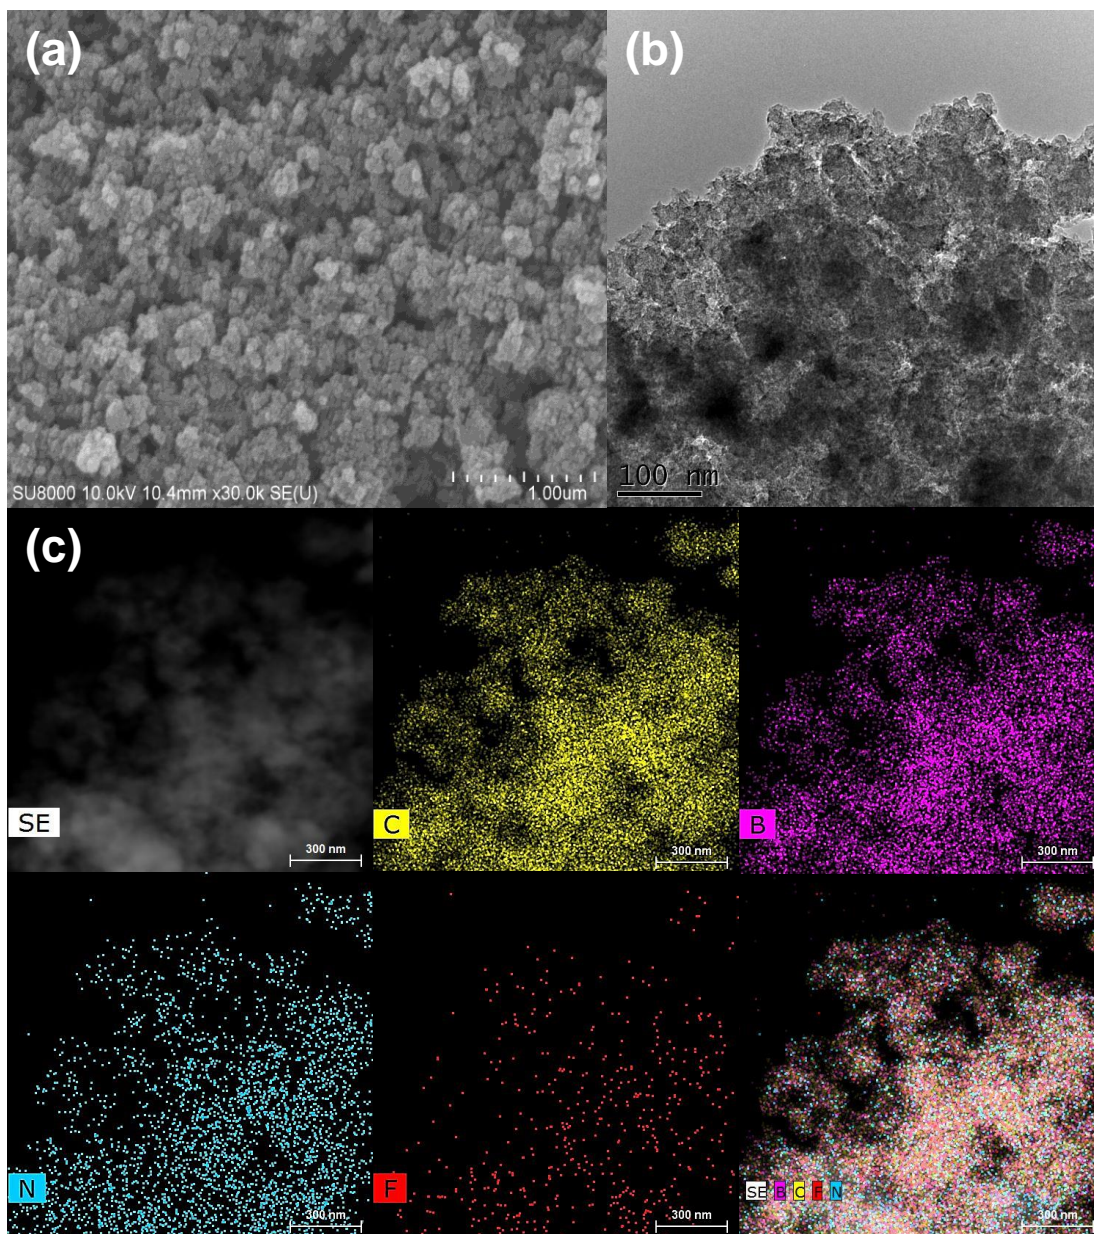

**Figure S3** SEM (a), TEM (b), HAADF-STEM (c) images and relative EDS mappings of BNFC-900 electrocatalyst.

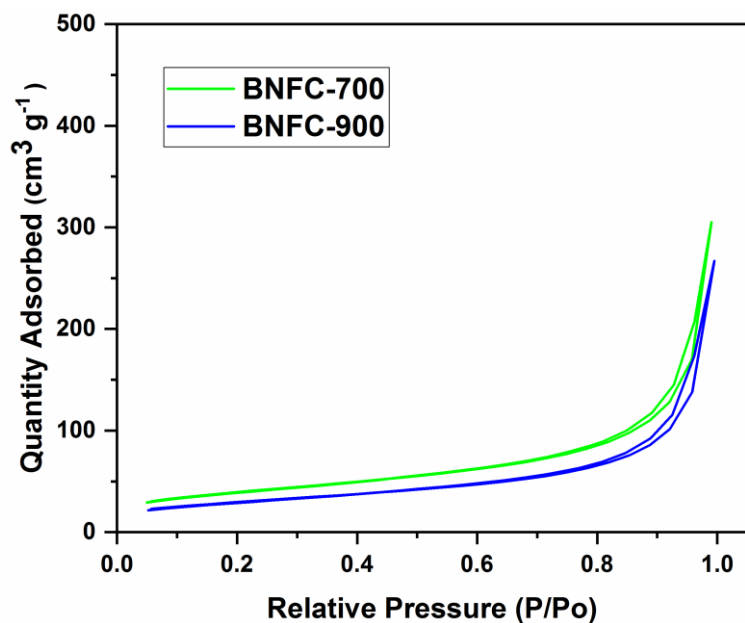

**Figure S4**  $N_2$  adsorption-desorption isothermal curves of BNFC-700 and BNFC-900 electrocatalysts.

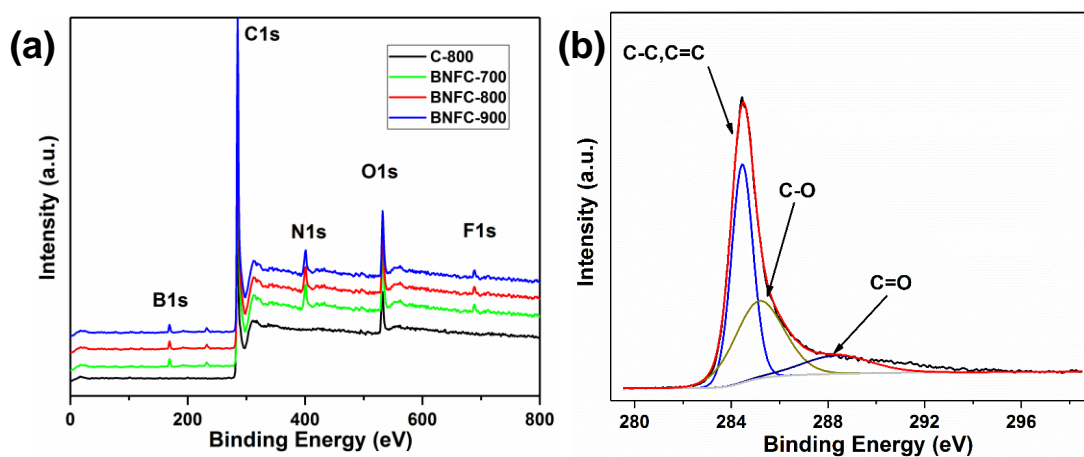

**Figure S5** (a) XPS survey scan of C-800, BNFC-700, BNFC-800 and BNFC-900 electrocatalysts. (b) Deconvoluted  $C1s$  peak of C-800 electrocatalyst.

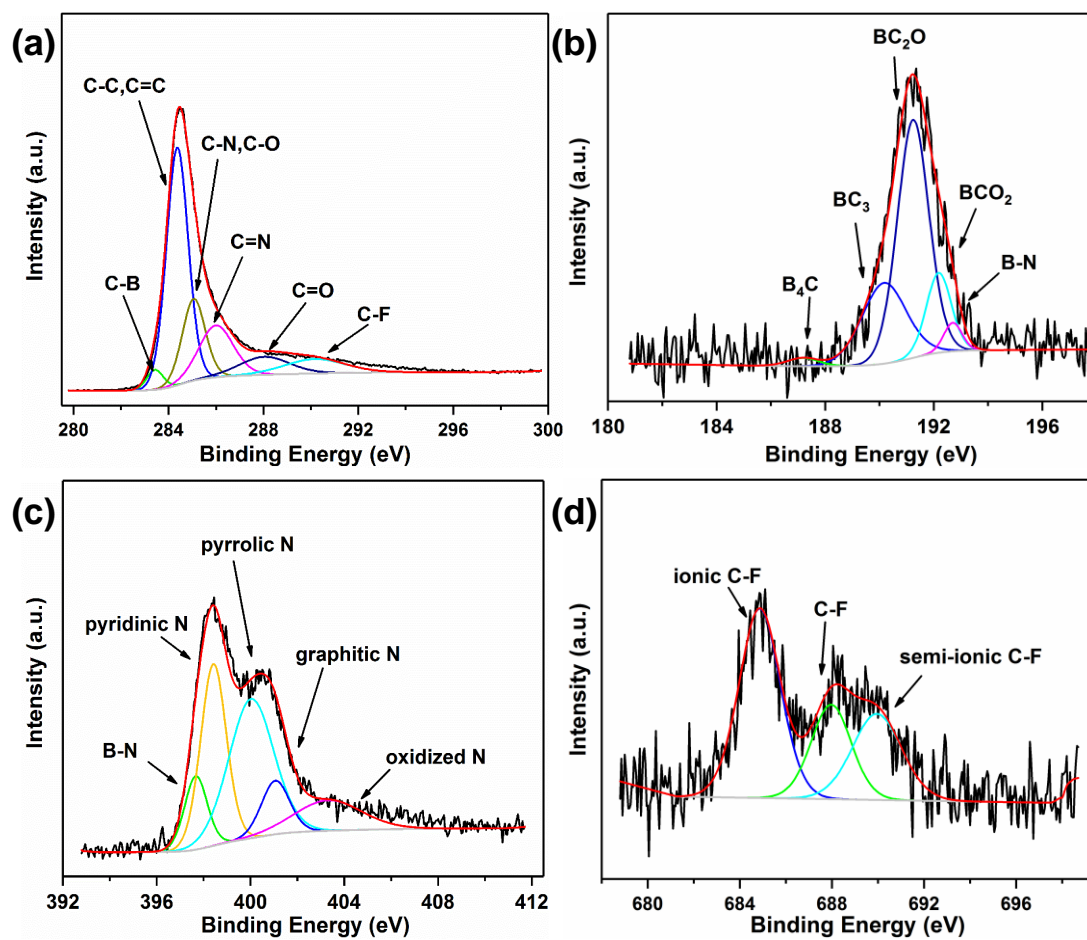

**Figure S6** Deconvoluted C1s (a), B1s (b), N1s (c) and F1s (d) peaks of BNFC-700 electrocatalyst.

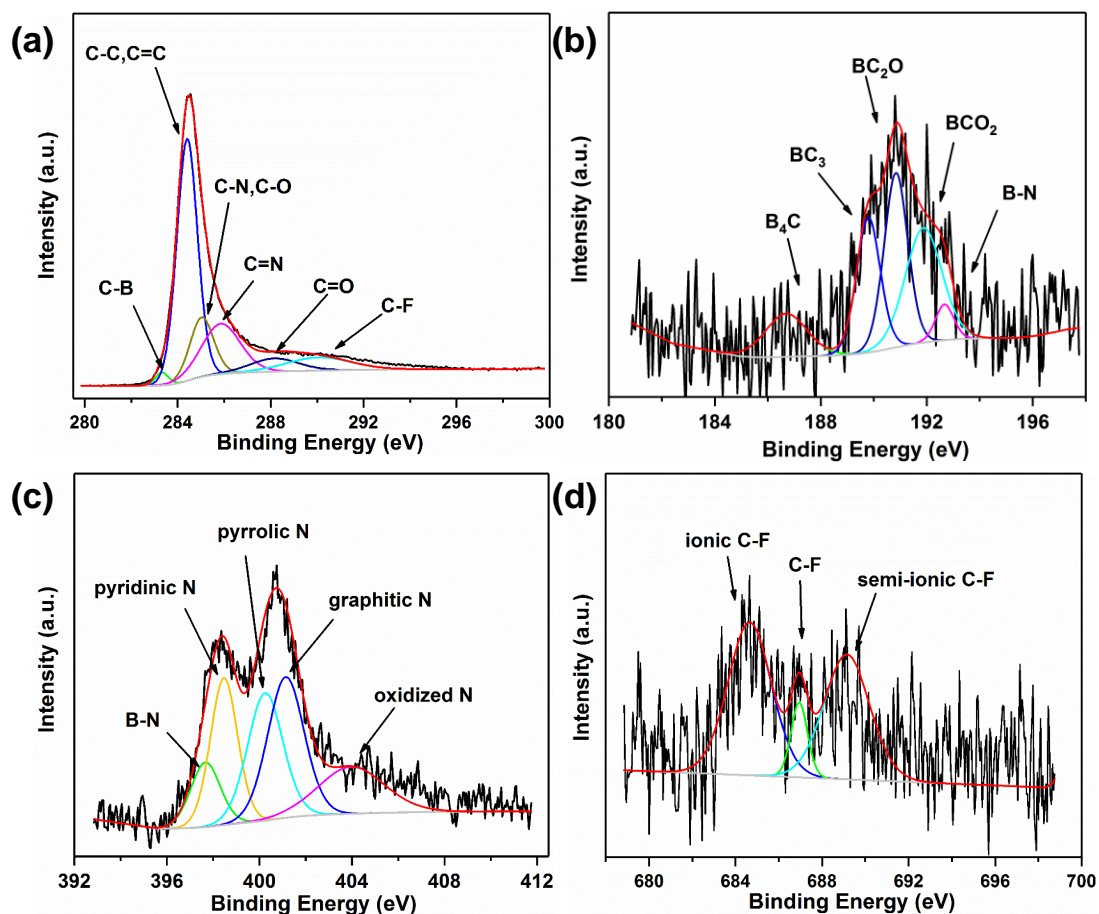

**Figure S7** Deconvoluted C1s (a), B1s (b), N1s (c) and F1s (d) peaks of BNFC-900 electrocatalyst.

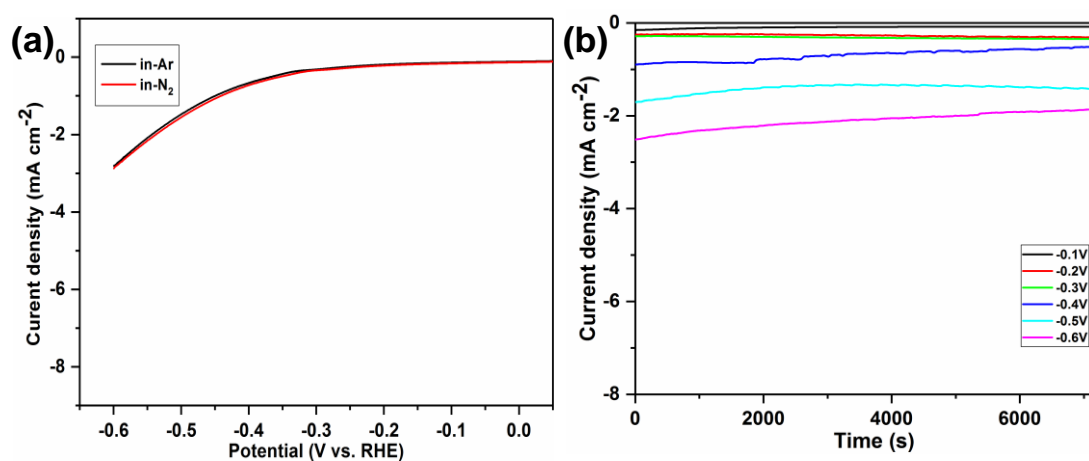

**Figure S8** (a) LSV curves of C-800 electrocatalyst recorded in Ar- and N<sub>2</sub>-saturated 0.05 M H<sub>2</sub>SO<sub>4</sub> electrolyte. (b) Chronoamperometric curves of C-800 electrocatalyst with different applied potentials.



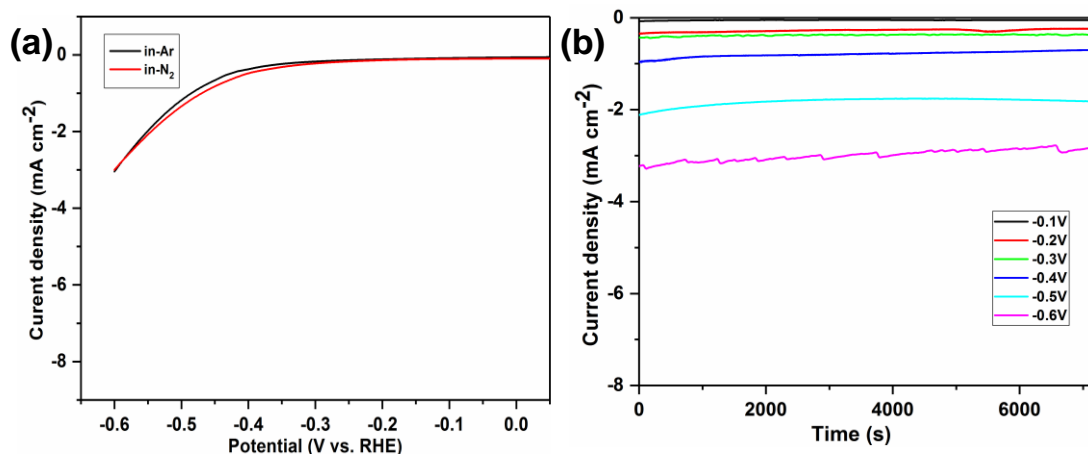

**Figure S9** (a) LSV curves of BNFC-700 electrocatalyst recorded in Ar- and N<sub>2</sub>-saturated 0.05 M H<sub>2</sub>SO<sub>4</sub> electrolyte. (b) Chronoamperometric curves of BNFC-700 electrocatalyst with different applied potentials.

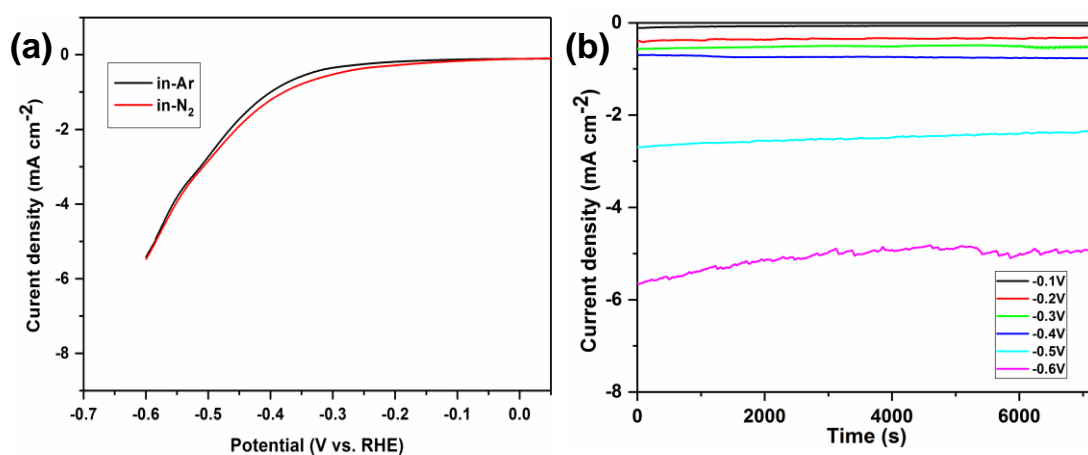

**Figure S10** (a) LSV curves of BNFC-900 electrocatalyst recorded in Ar- and N<sub>2</sub>-saturated 0.05 M H<sub>2</sub>SO<sub>4</sub> electrolyte. (b) Chronoamperometric curves of BNFC-900 electrocatalyst with different applied potentials.

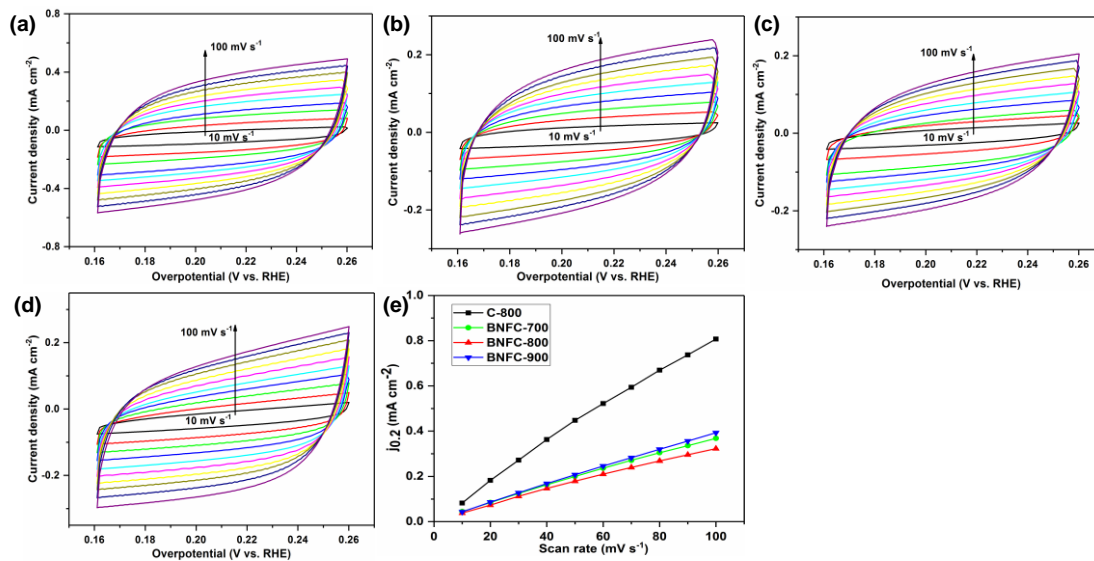

**Figure S11** Cyclic voltammograms of C-800 (a), BNFC-700 (b), BNFC-800 (c) and BNFC-900 (d) electrocatalysts recorded from 0.16 V to 0.26 V vs. RHE. Double-layer capacitances (e) of C-800, BNFC-700, BNFC-800 and BNFC-900 electrocatalysts.

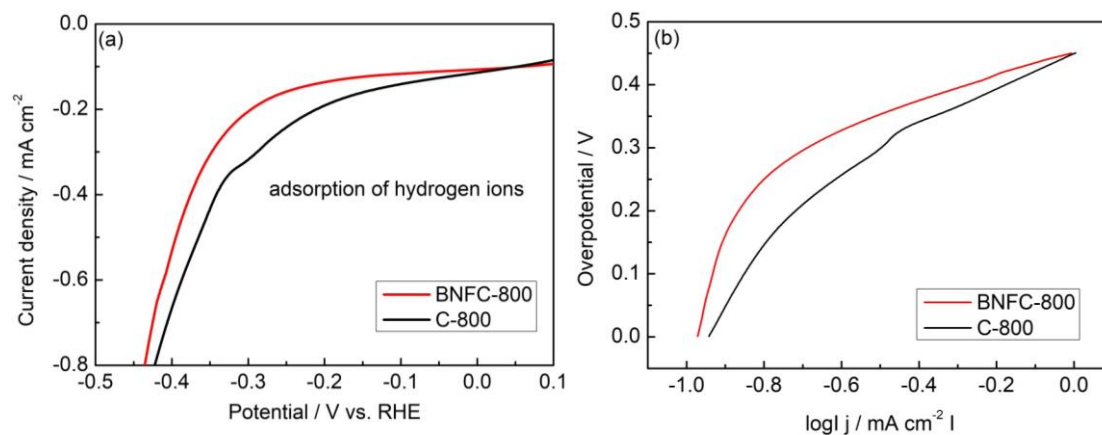

**Figure S12** LSV curves and Tafel slope (b) of BNFC-800 and C-800 tested in Ar-purged 0.05 M H<sub>2</sub>SO<sub>4</sub> electrolyte.



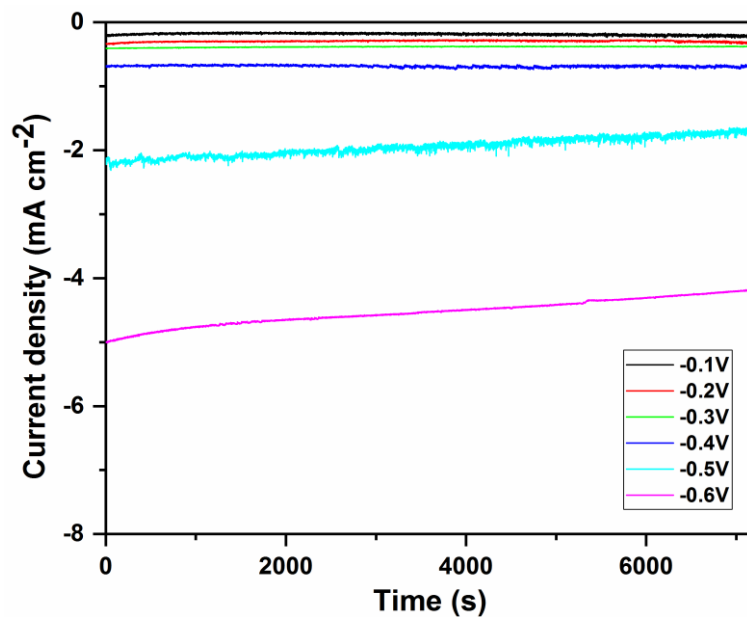

**Figure S13** Chronoamperometric curves of BNFC-800 electrocatalyst with different applied potentials.

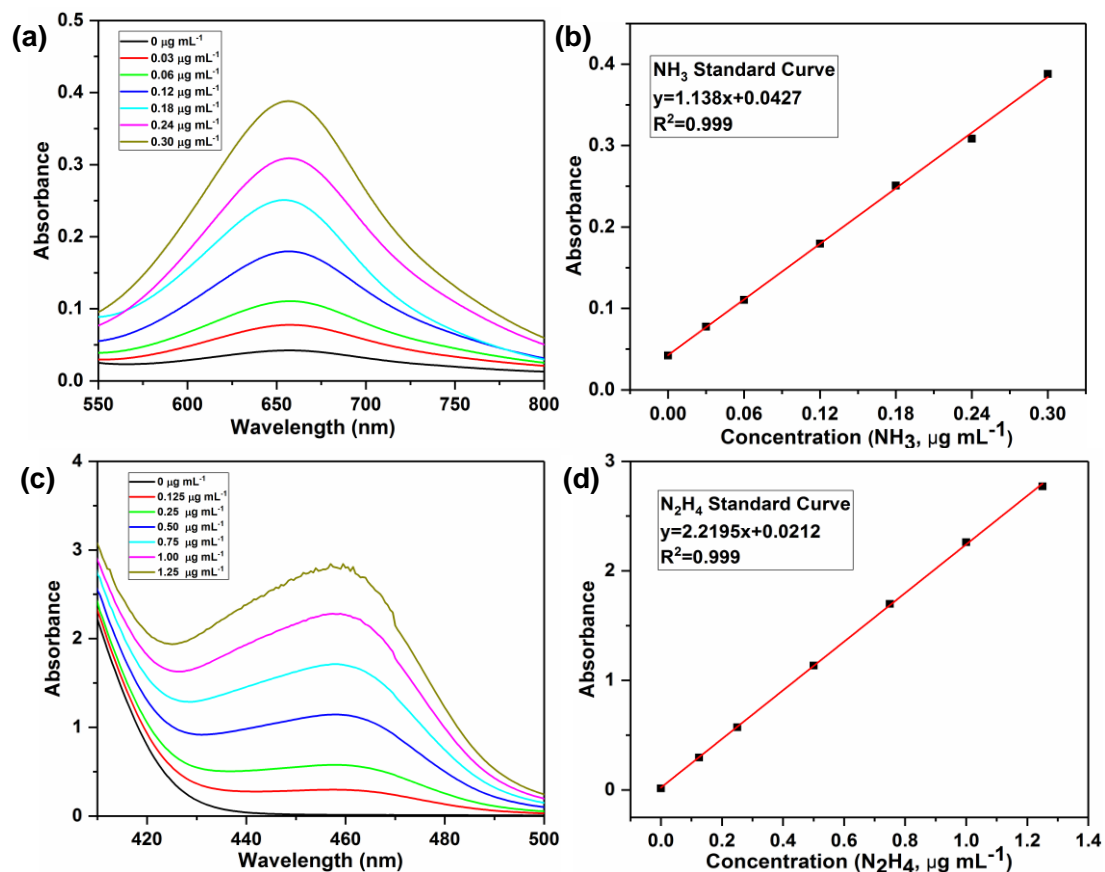

**Figure S14** UV-vis spectroscopies of colorimetry and calibration of colorimetric  $\text{NH}_3$  (a, b) and  $\text{N}_2\text{H}_4$  (c, d) assay by salicylic acid spectrophotometry.

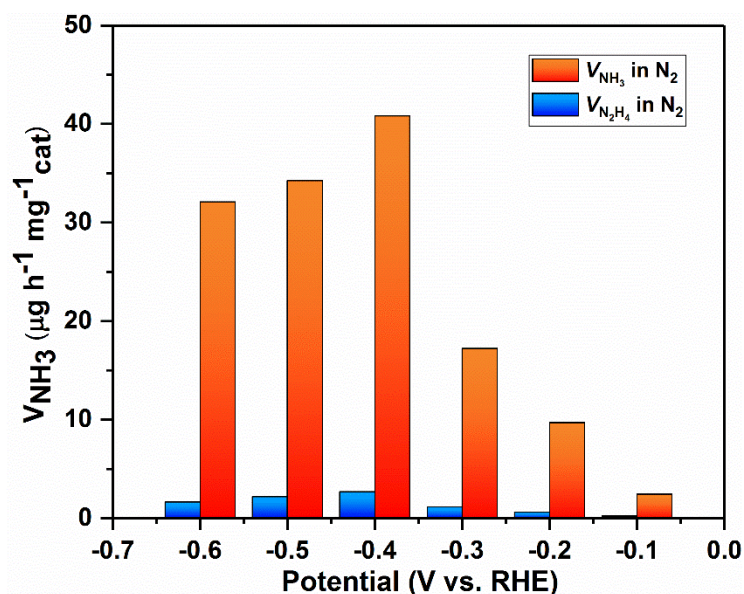

**Figure S15** Calculated  $\text{NH}_3$  and  $\text{N}_2\text{H}_4$  yield rates of BNFC-800 electrocatalyst tested in 0.05 M  $\text{H}_2\text{SO}_4$  electrolyte.

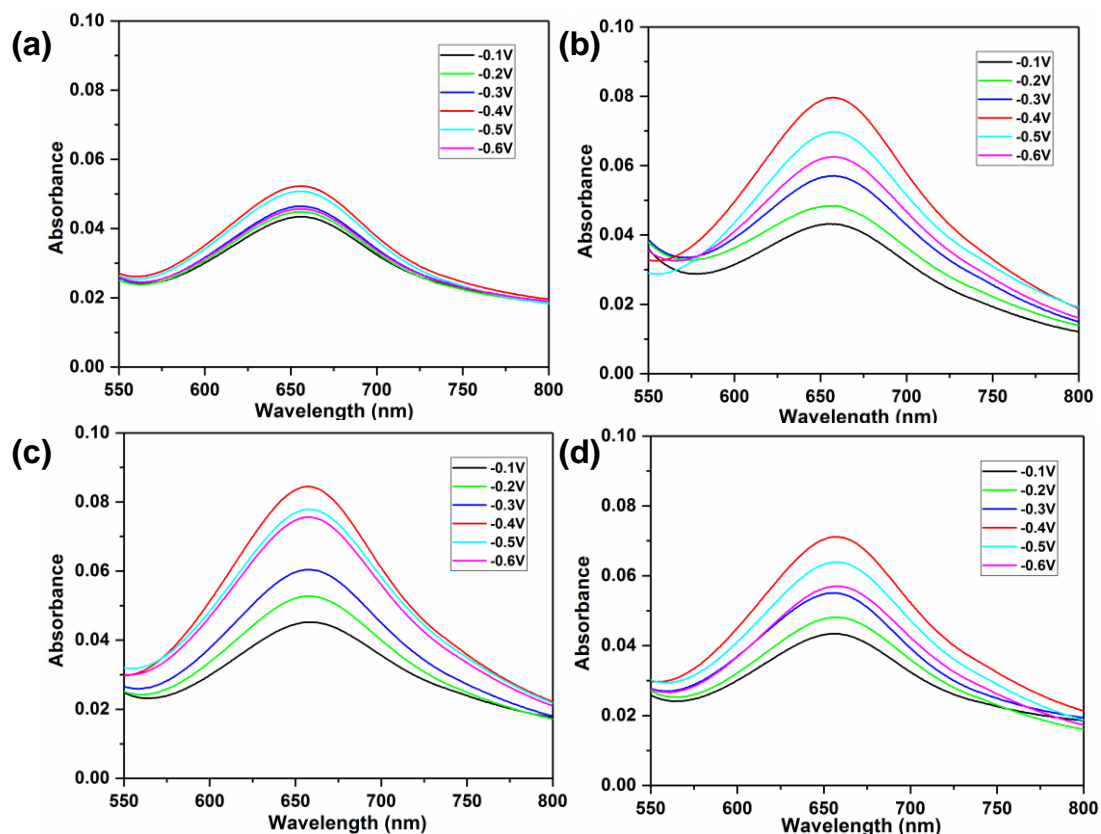

**Figure S16** UV-vis spectroscopies of the electrolyte after testing with C-800 (a), BNFC-700 (b), BNFC-800 (c) and BNFC-900 (d) electrocatalysts for 2 h at different potentials in 0.05 M  $\text{H}_2\text{SO}_4$  electrolyte.

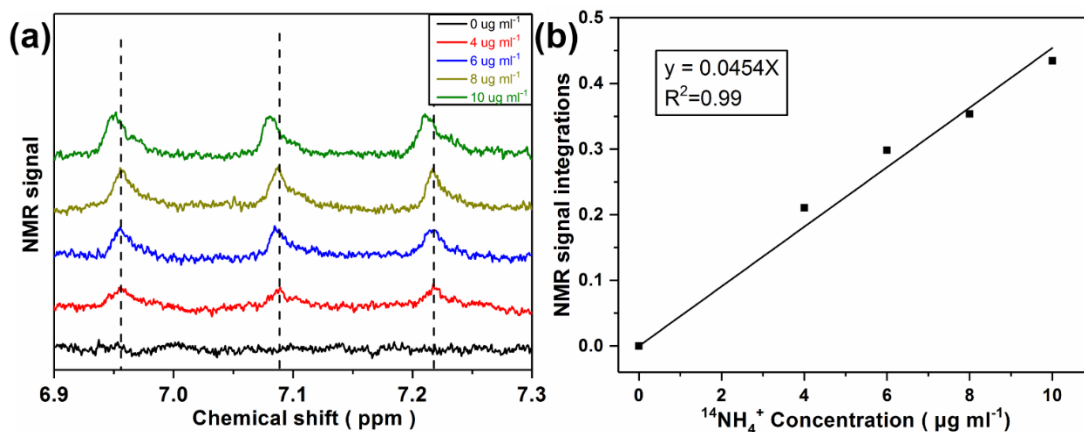

**Figure S17** (a) NMR spectra of various  $(\text{NH}_4)_2\text{SO}_4$  concentrations. (b) Plots of peak intensity as function of  $(\text{NH}_4)_2\text{SO}_4$  concentrations.

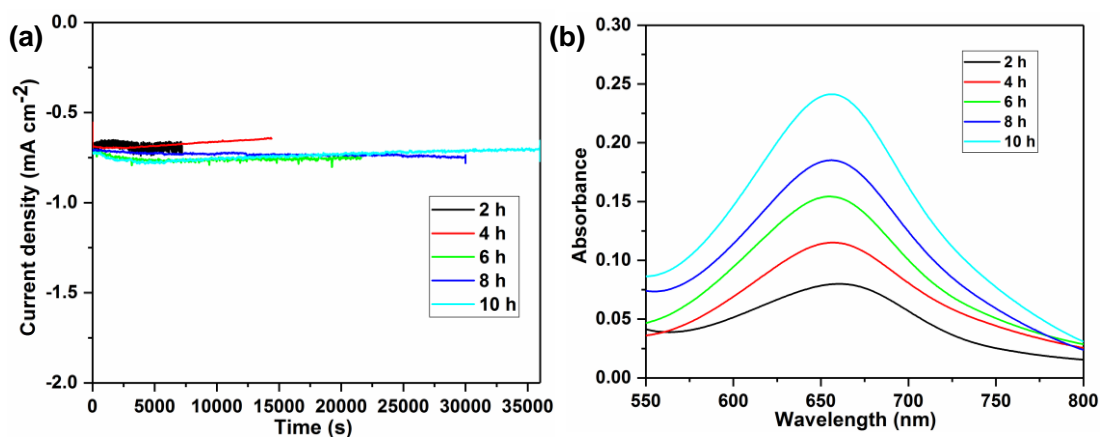

**Figure S18** (a) Current densities recorded at -0.4 V vs. RHE for various durations. (b) UV-vis spectroscopies of the electrolyte after testing with BNFC-800 electrocatalyst for different times at -0.4 V vs. RHE in 0.05 M  $\text{H}_2\text{SO}_4$  electrolyte.

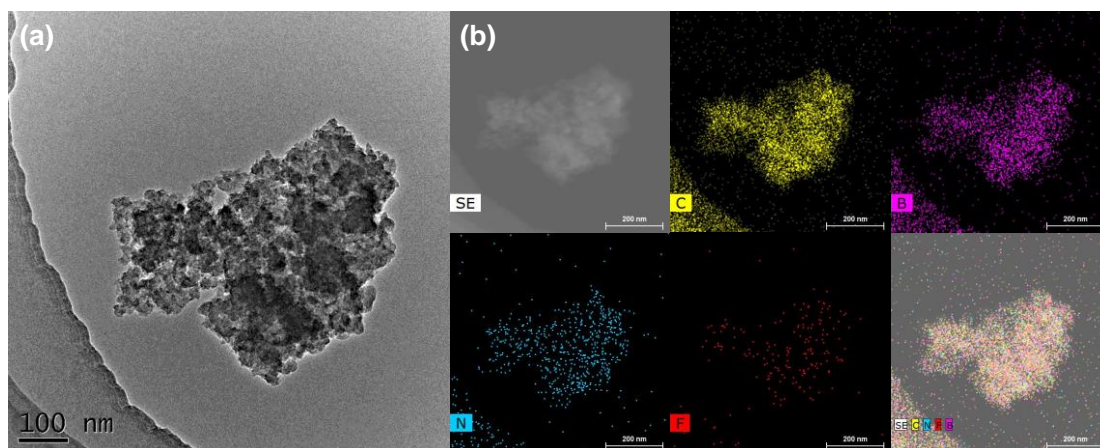

**Figure S19** TEM (a), HAADF-STEM images (b) and relative EDS mappings of C, N, B and F elements in BNFC-800 electrocatalysts after stability test in 0.05 M  $\text{H}_2\text{SO}_4$  electrolyte.

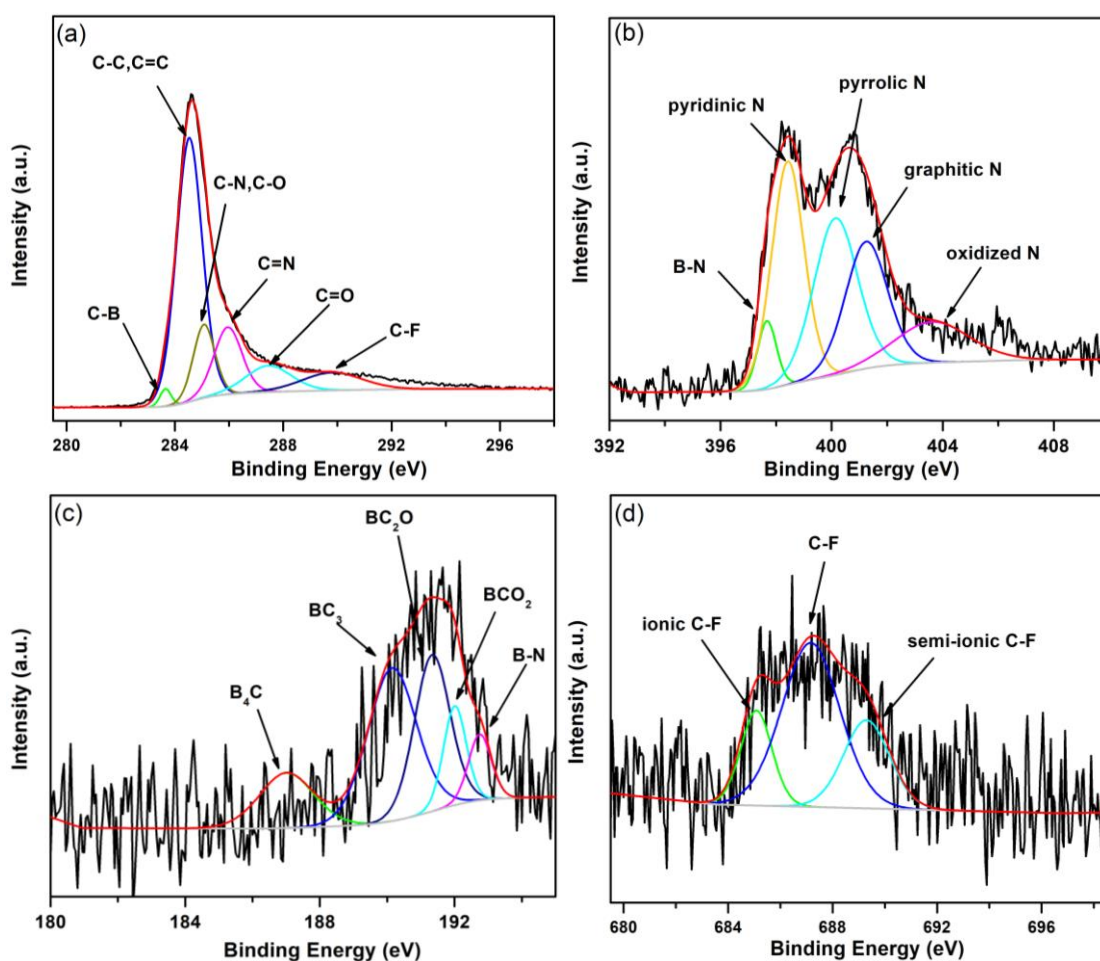

**Figure S20** Deconvoluted C1s (a), N1s (b), B1s (c) and F1s (d) peaks of BNFC-800 after 10 h NRR catalysis in 0.05 M  $\text{H}_2\text{SO}_4$  electrolyte.

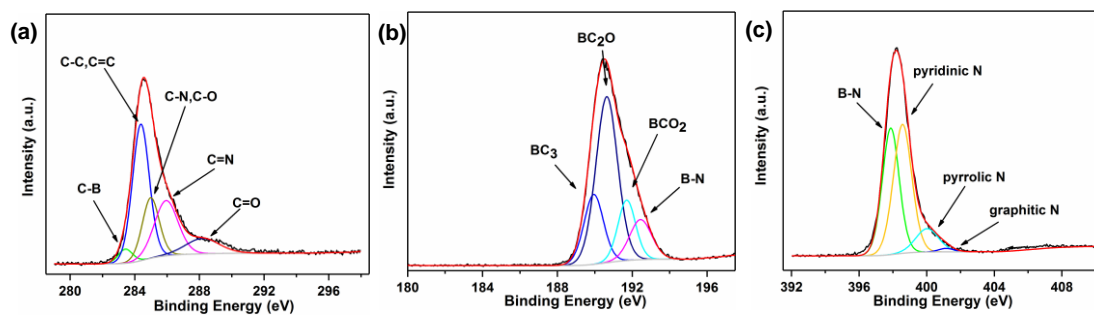

**Figure S21** Deconvoluted C1s (a), B1s (b) and N1s (c) peaks of BNC-800 electrocatalyst.

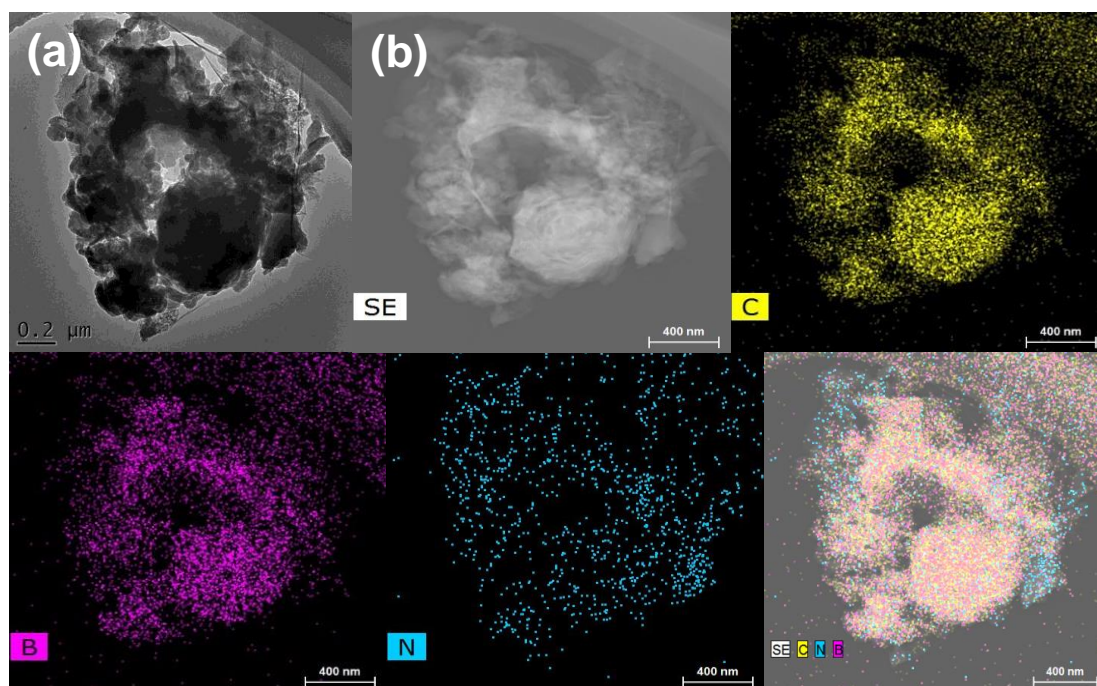

**Figure S22** TEM (a), HAADF-STEM (b) images and relative EDS mappings of C, N and B elements of BNC-800 electrocatalyst.



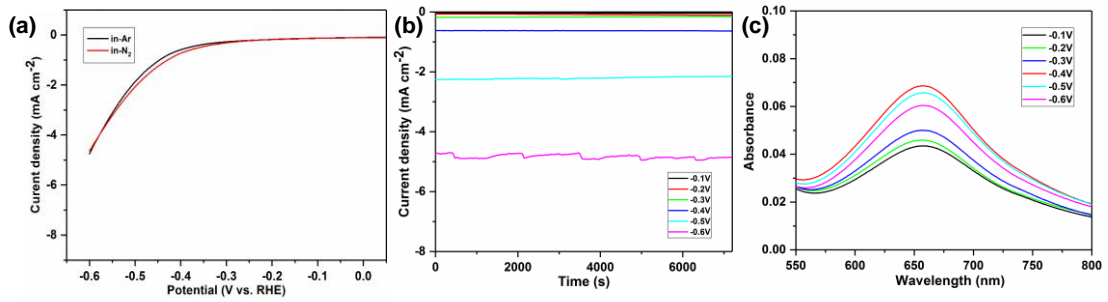

**Figure S23** (a) LSV curves of BNC-800 electrocatalyst recorded in Ar- and N<sub>2</sub>-saturated 0.05 M H<sub>2</sub>SO<sub>4</sub> electrolyte. (b) Chronoamperometric curves of BNC-800 electrocatalyst with different applied potentials. (c) UV-vis spectroscopies of the electrolyte after testing with BNC-800 electrocatalyst for 2 h at different potentials in 0.05 M H<sub>2</sub>SO<sub>4</sub> electrolyte.

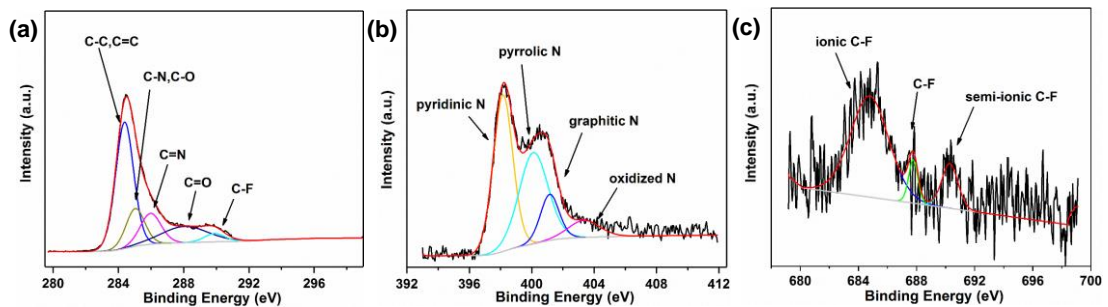

**Figure S24** Deconvoluted C1s (a), N1s (b) and F1s (c) peaks of NFC-800 electrocatalyst.



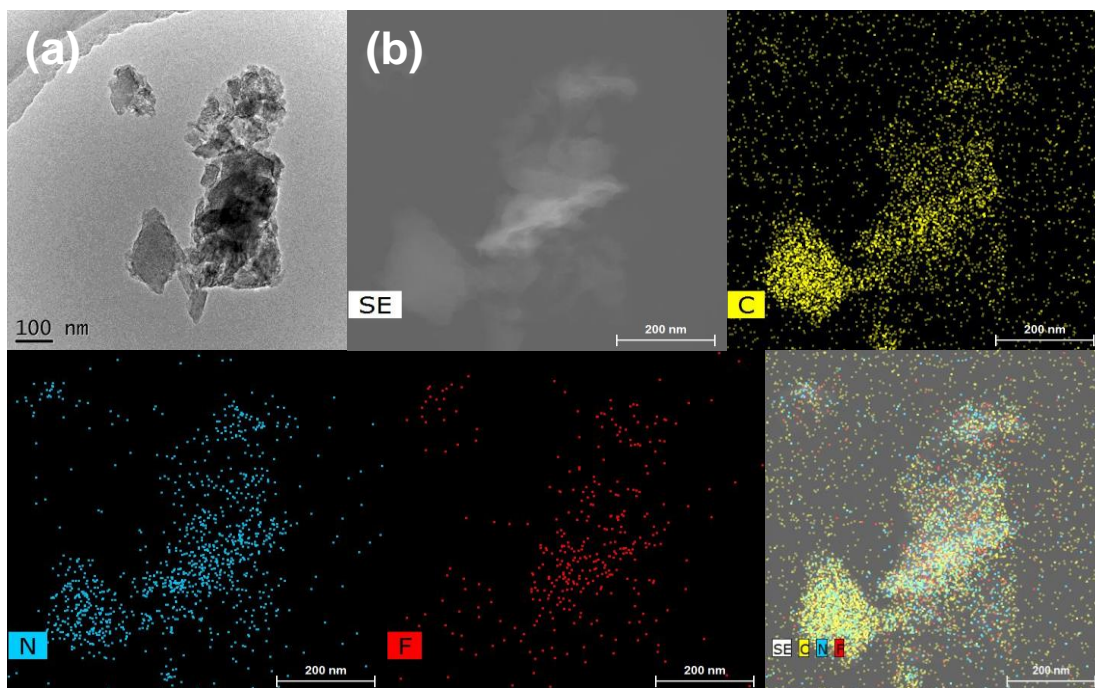

**Figure S25** TEM (a), HAADF-STEM (b) images and relative EDS mappings of C, N and F elements of NFC-800 electrocatalyst.

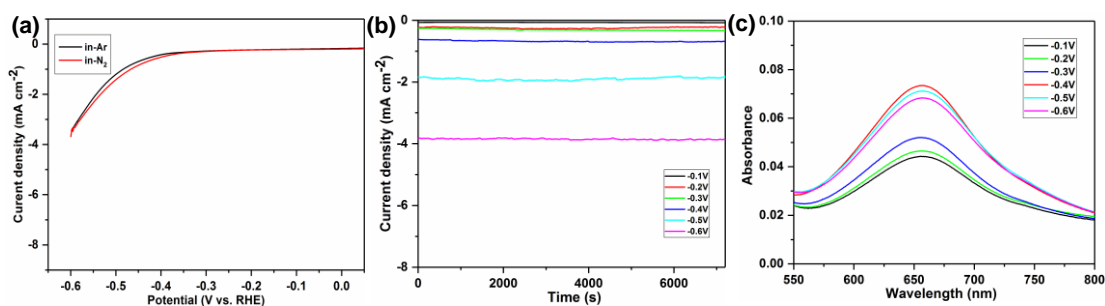

**Figure S26** (a) LSV curves of NFC-800 electrocatalyst recorded in Ar- and  $N_2$ -saturated 0.05 M  $H_2SO_4$  electrolyte. (b) Chronoamperometric curves of NFC-800 electrocatalyst with different applied potentials. (c) UV-vis spectroscopies of the electrolyte after testing with NFC-800 electrocatalyst for 2 h at different potentials in 0.05 M  $H_2SO_4$  electrolyte.

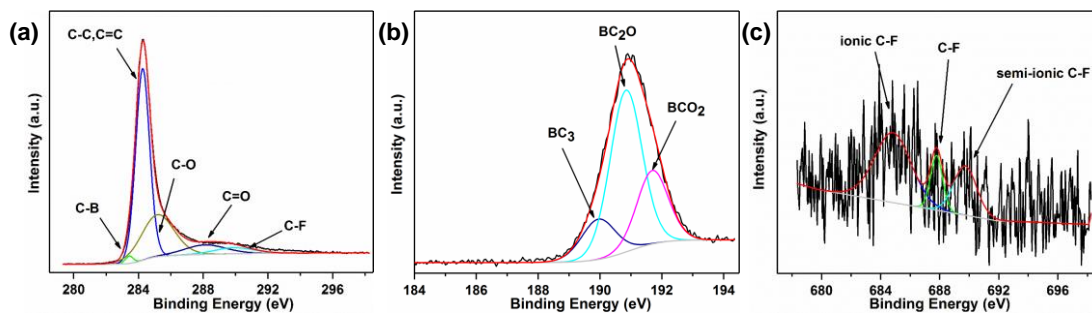

**Figure S27** Deconvoluted C1s (a), B1s (b) and F1s (c) peaks of BFC-800 electrocatalyst.

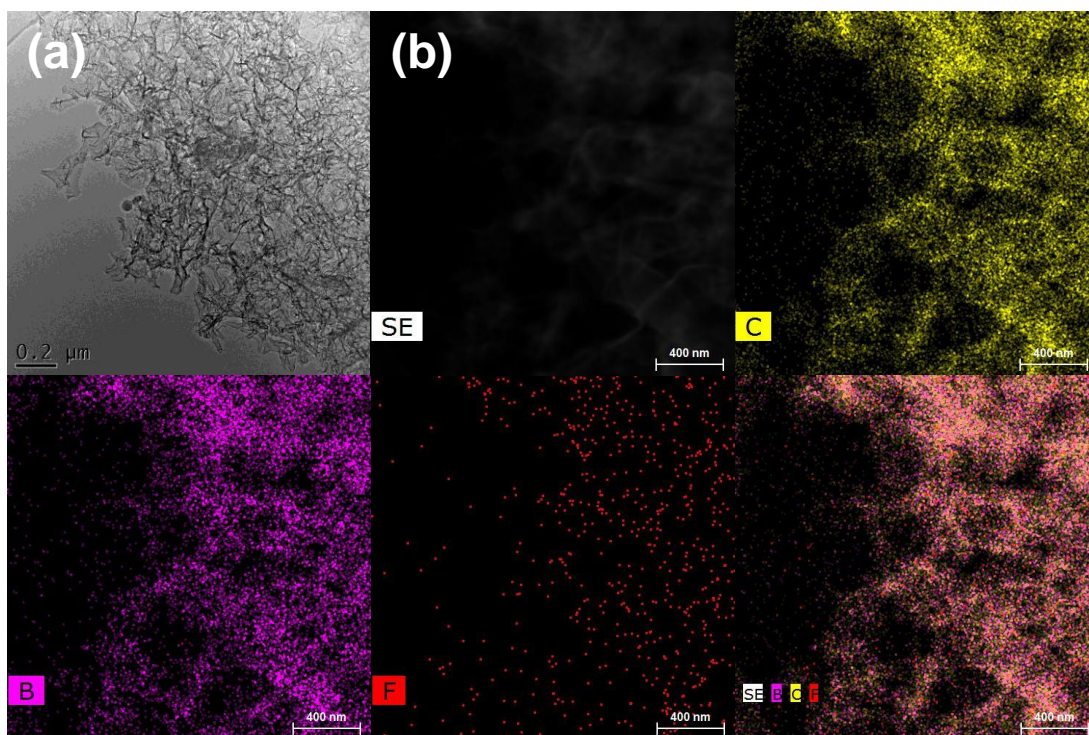

**Figure S28** TEM (a), HAADF-STEM (b) images and relative EDS mappings of C, N and F elements of BFC-800 electrocatalyst.

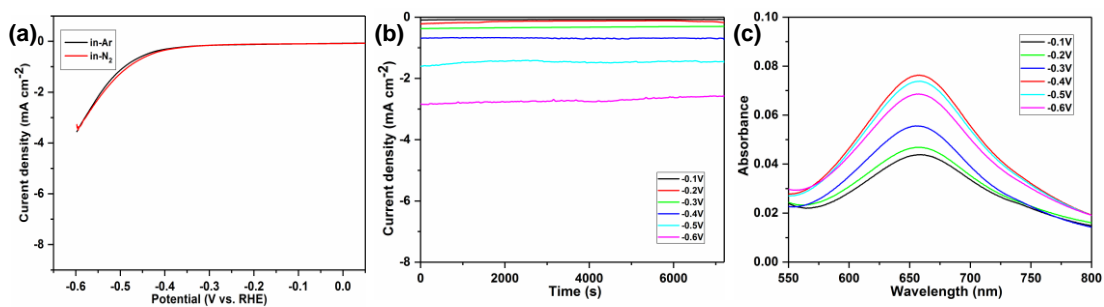

**Figure S29** (a) LSV curves of BFC-800 electrocatalyst recorded in Ar- and N<sub>2</sub>-saturated 0.05 M H<sub>2</sub>SO<sub>4</sub> electrolyte. (b) Chronoamperometric curves of BFC-800 electrocatalyst with different applied potentials. (c) UV-vis spectroscopies of the electrolyte after testing with BFC-800 electrocatalyst for 2 h at different potentials in 0.05 M H<sub>2</sub>SO<sub>4</sub> electrolyte.

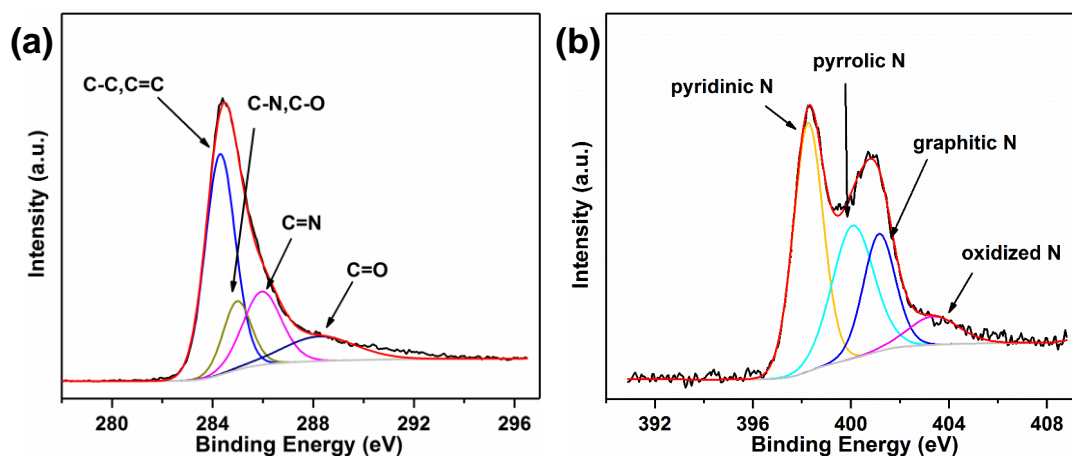

**Figure S30** Deconvoluted C1s (a) and N1s (b) peaks of NC-800 electrocatalyst.

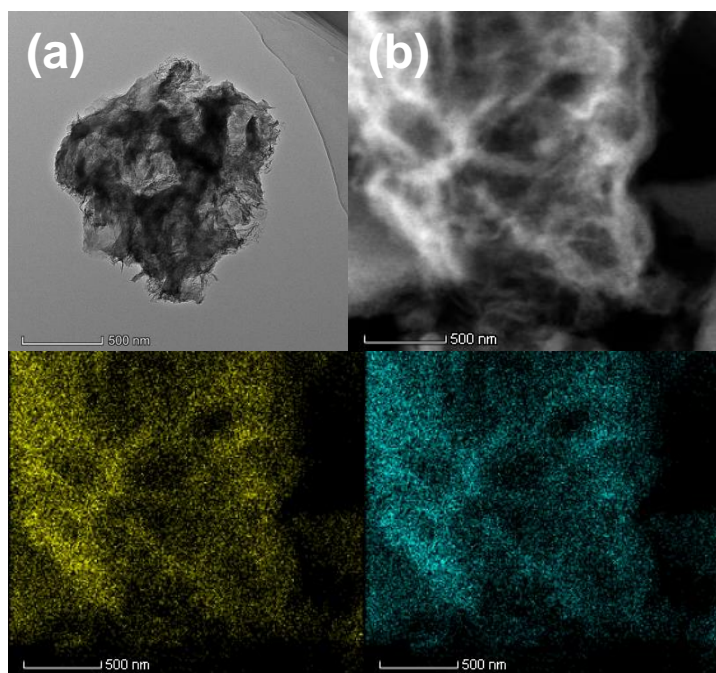

**Figure S31** TEM (a), HAADF-STEM (b) images and relative EDS mappings of C and N elements of NC-800 electrocatalyst.

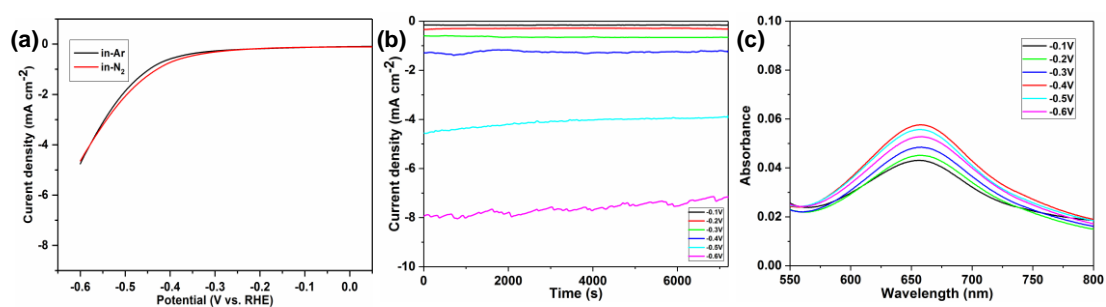

**Figure S32** LSV curves of NC-800 electrocatalyst recorded in Ar- and  $\text{N}_2$ -saturated 0.05 M  $\text{H}_2\text{SO}_4$  electrolyte. (b) Chronoamperometric curves of NC-800 electrocatalyst with different applied potentials. (c) UV-vis spectroscopies of the electrolyte after testing with NC-800 electrocatalyst for 2 h at different potentials in 0.05 M  $\text{H}_2\text{SO}_4$  electrolyte.



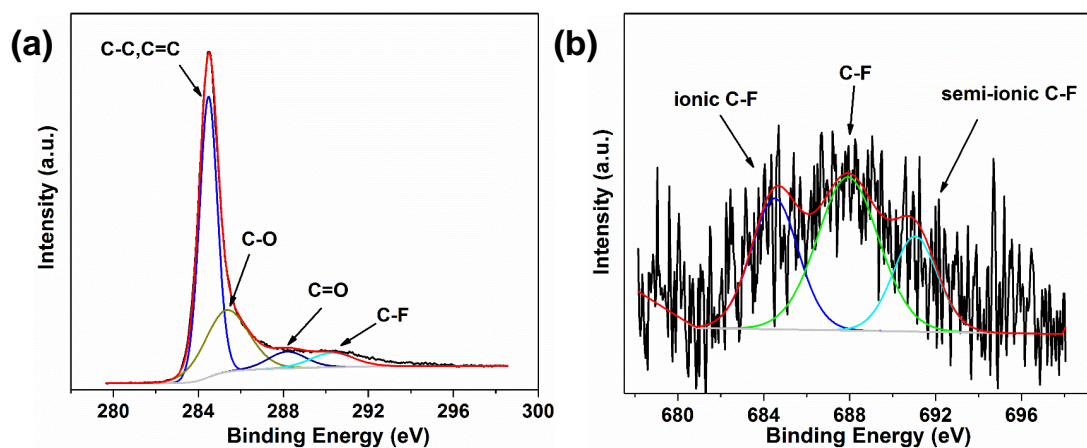

**Figure S33** Deconvoluted C1s (a) and F1s (b) peaks of FC-800 electrocatalyst.

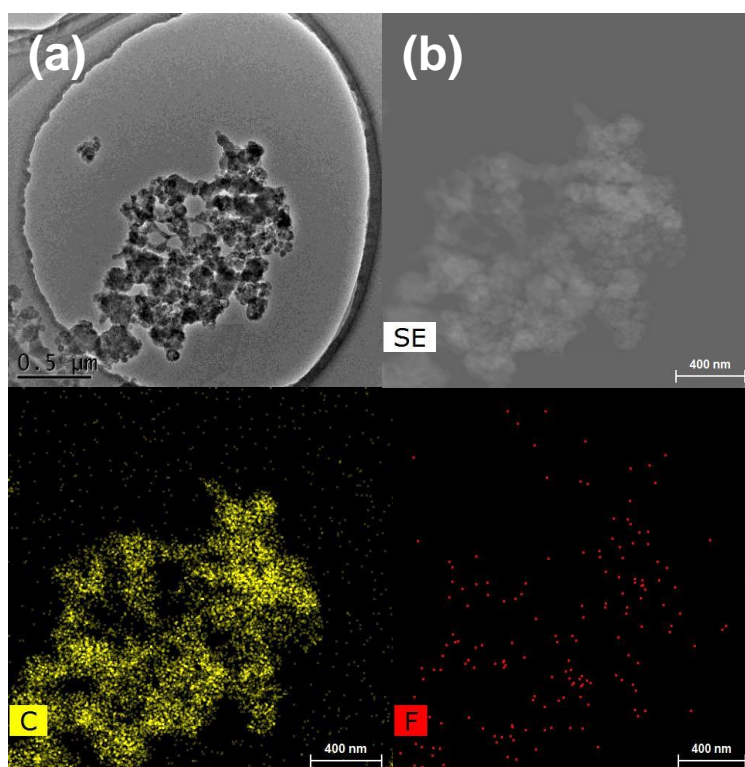

**Figure S34** TEM (a), HAADF-STEM (b) images and relative EDS mappings of C and F elements of FC-800 electrocatalyst.

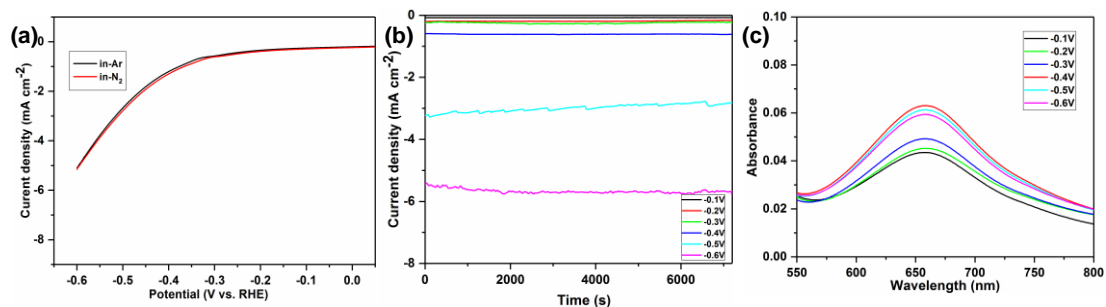

**Figure S35** (a) LSV curves of FC-800 electrocatalyst recorded in Ar- and N<sub>2</sub>-saturated 0.05 M H<sub>2</sub>SO<sub>4</sub> electrolyte. (b) Chronoamperometric curves of FC-800 electrocatalyst with different applied potentials. (c) UV-vis spectroscopies of the electrolyte after testing with FC-800 electrocatalyst for 2 h at different potentials in 0.05 M H<sub>2</sub>SO<sub>4</sub> electrolyte.

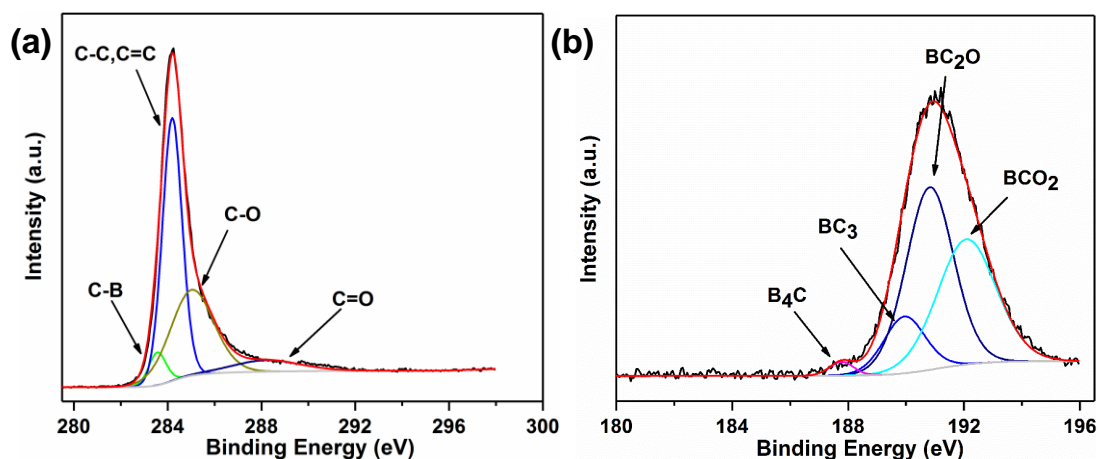

**Figure S36** Deconvoluted C1s (a) and B1s (b) peaks of BC-800 electrocatalyst.



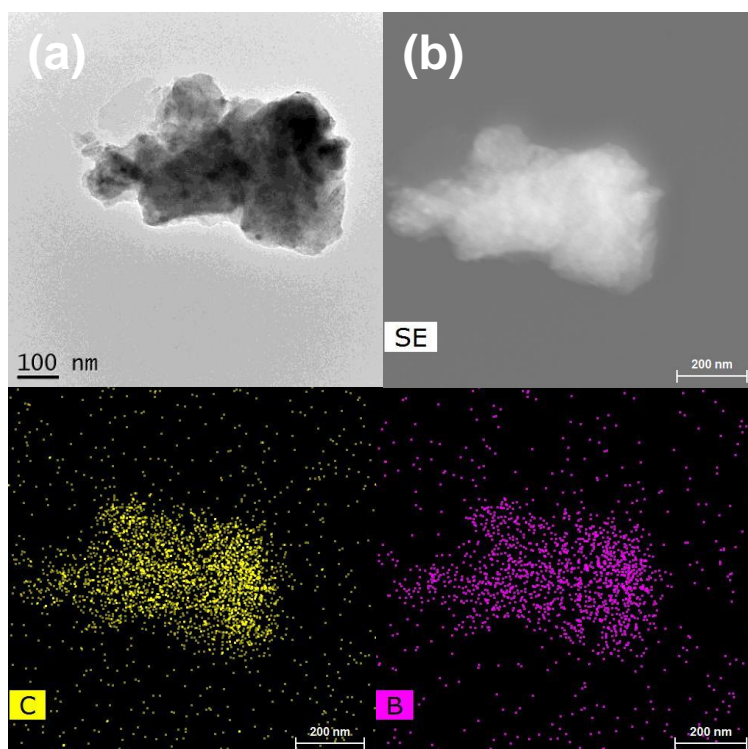

**Figure S37** TEM (a), HAADF-STEM (b) images and relative EDS mappings of C and B elements of BC-800 electrocatalyst.

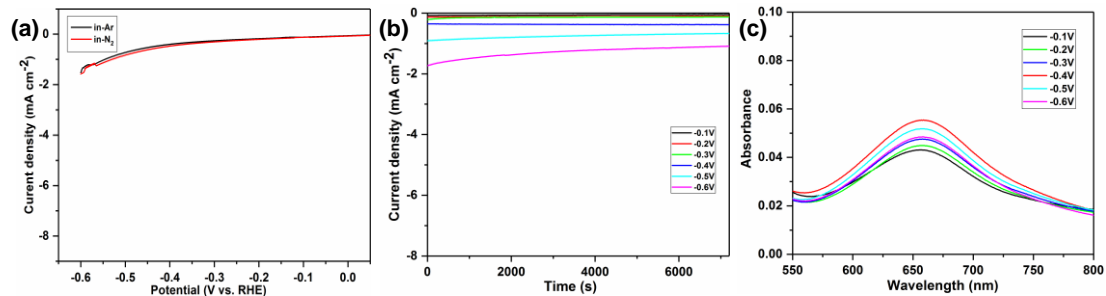

**Figure S38** LSV curves of BC-800 electrocatalyst recorded in Ar- and  $N_2$ -saturated 0.05 M  $H_2SO_4$  electrolyte. (b) Chronoamperometric curves of BC-800 electrocatalyst with different applied potentials. (c) UV-vis spectroscopies of the electrolyte after testing with BC-800 electrocatalyst for 2 h at different potentials in 0.05 M  $H_2SO_4$  electrolyte.

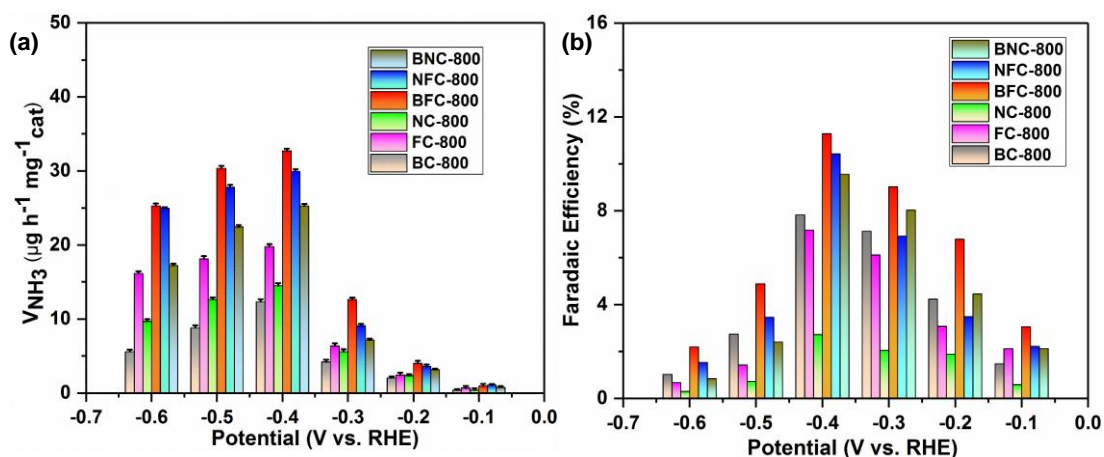

**Figure S39** The  $\text{NH}_3$  yield rates and Faradaic efficiencies of BNC-800, NFC-800, NC-800, FC-800 and BC-800 electrocatalysts at different potentials.

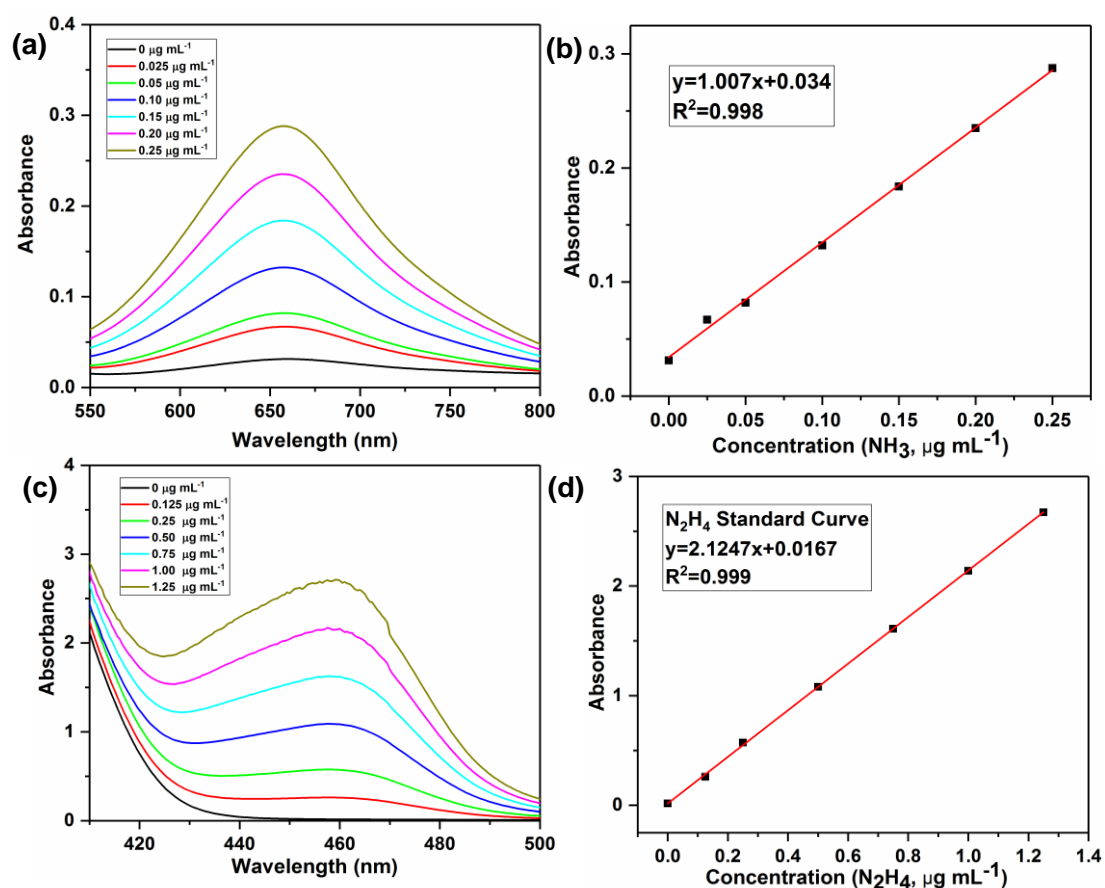

**Figure S40** UV-vis spectroscopies of colorimetry and calibration of colorimetric  $\text{NH}_3$  (a, b) and  $\text{N}_2\text{H}_4$  (c, d) assay by salicylic acid spectrophotometry in 0.1 M NaOH electrolyte.

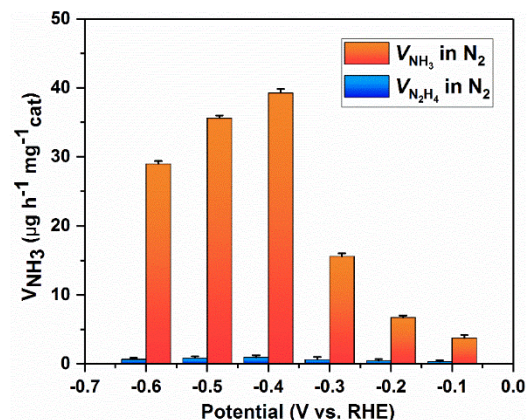

**Figure S41** Calculated NH<sub>3</sub> and N<sub>2</sub>H<sub>4</sub> yield rates of BNFC-800 electrocatalyst tested in 0.1 M NaOH electrolyte.

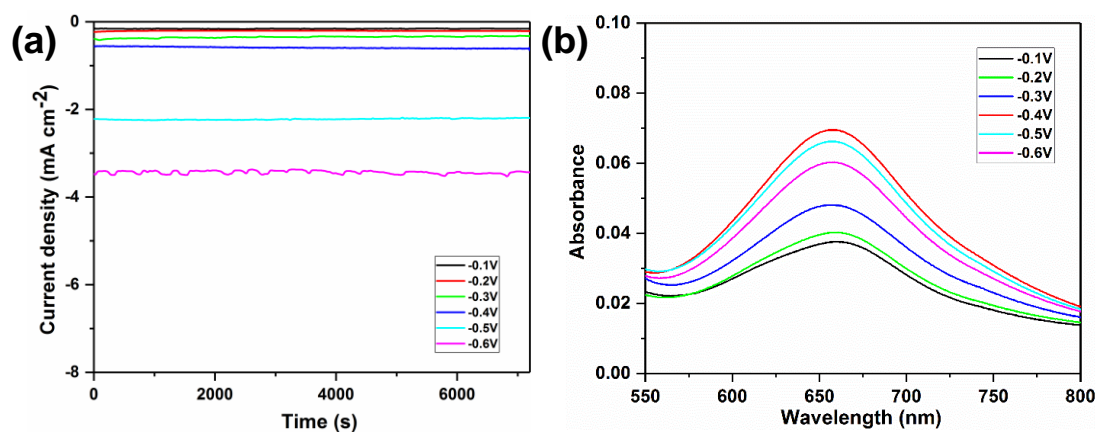

**Figure S42** (a) Chronoamperometric curves of BNFC-800 electrocatalyst with different applied potentials. (b) UV-vis spectroscopies of the electrolyte after testing with BNFC-800 electrocatalyst for 2 h at different potentials in 0.1 M NaOH electrolyte.

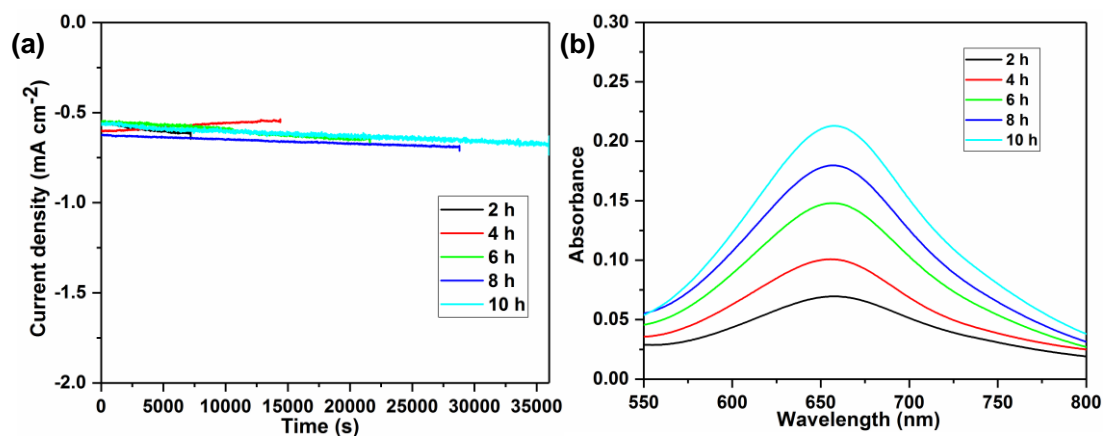

**Figure S43** (a) Current densities recorded at -0.4 V vs. RHE for various durations. (b) UV-vis spectroscopies of the electrolyte after testing with BNFC-800 electrocatalyst for different times at -0.4 V vs. RHE in 0.1 M NaOH electrolyte.

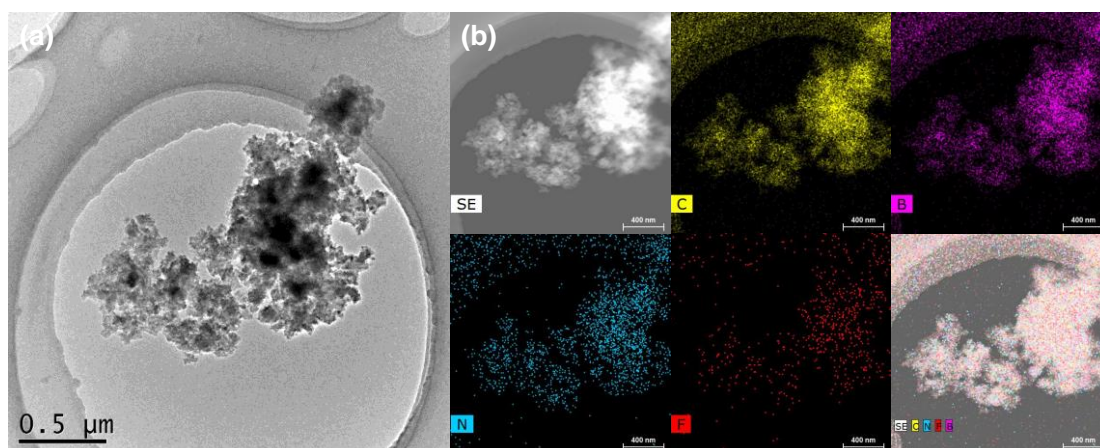

**Figure S44** TEM (a), HAADF-STEM images (b) and relative EDS mappings of C, N, B and F elements in BNFC-800 electrocatalyst after stability test in 0.1 M NaOH electrolyte.

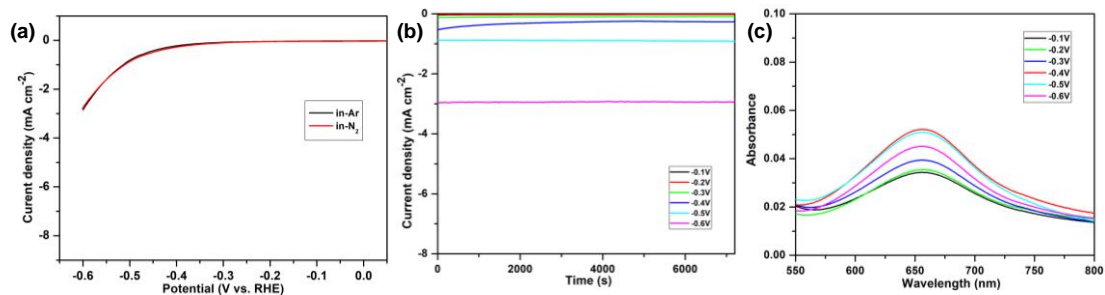

**Figure S45** LSV (a) and Chronoamperometric (b) curves of BFC-800 electrocatalyst with different applied potentials. (c) UV-vis spectroscopies of the electrolyte after testing with BFC-800 electrocatalyst for 2 h at different potentials in 0.1 M NaOH electrolyte.

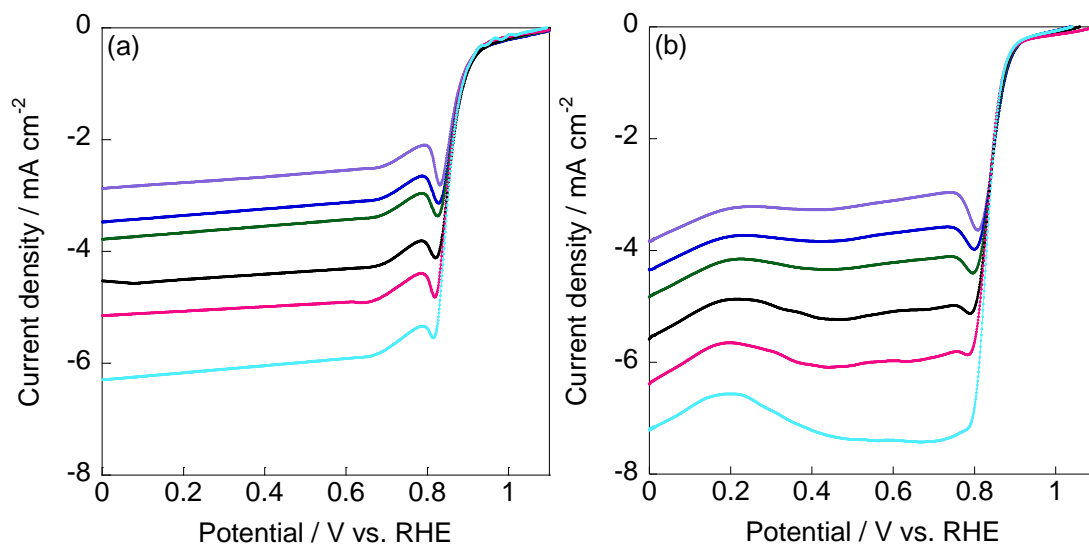

**Figure S46** LSV curves of commercial Pt/C (a) and BNFC-800 (b) with various rotation speeds.

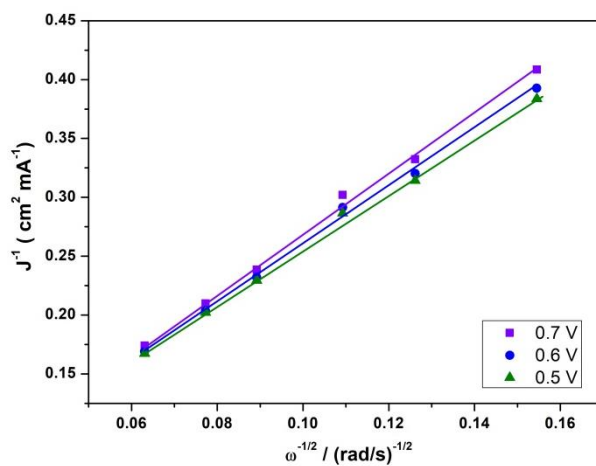

**Figure S47** Number of electrons involved in ORR at various potentials of commercial Pt/C.

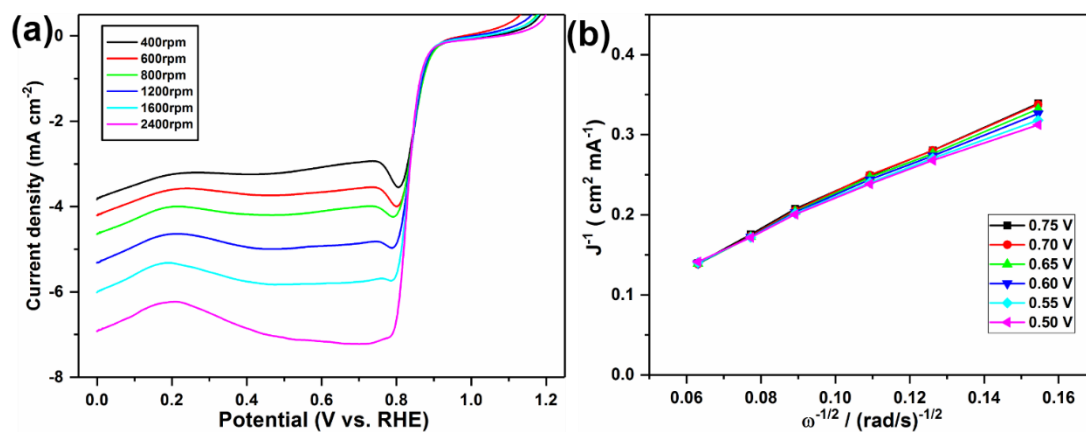

**Figure S48** (a) LSV curves of BNFC-800 with various rotation speeds after 5000 potential cycles. (b) Number of electrons involved in ORR at various potentials after 5000 potential cycles.



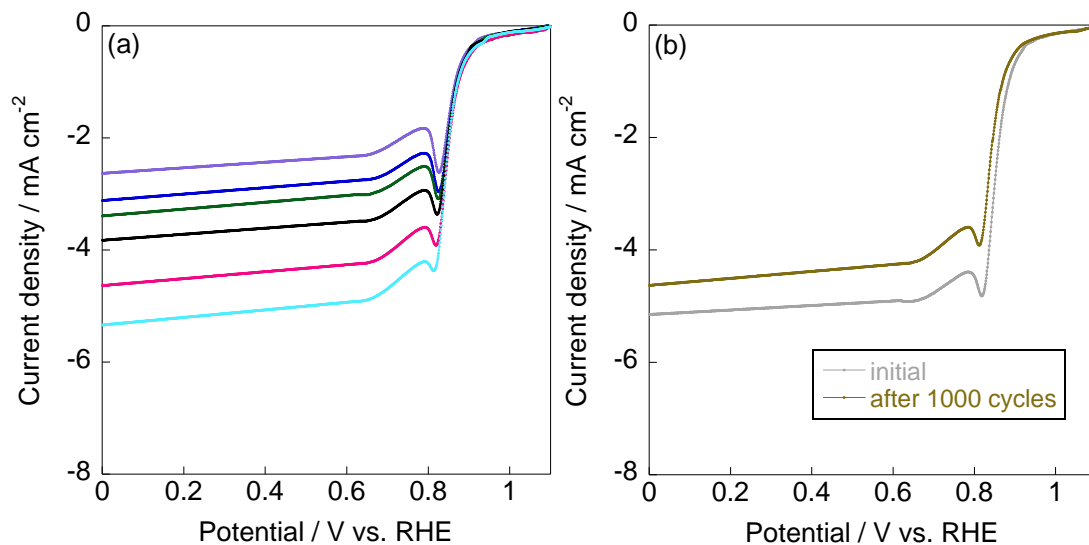

**Figure S49** LSV curves of commercial Pt/C with various rotation speeds after 1000 potential cycles. (b) Comparison of ORR activity of commercial Pt/C before and after 1000 potential cycles.

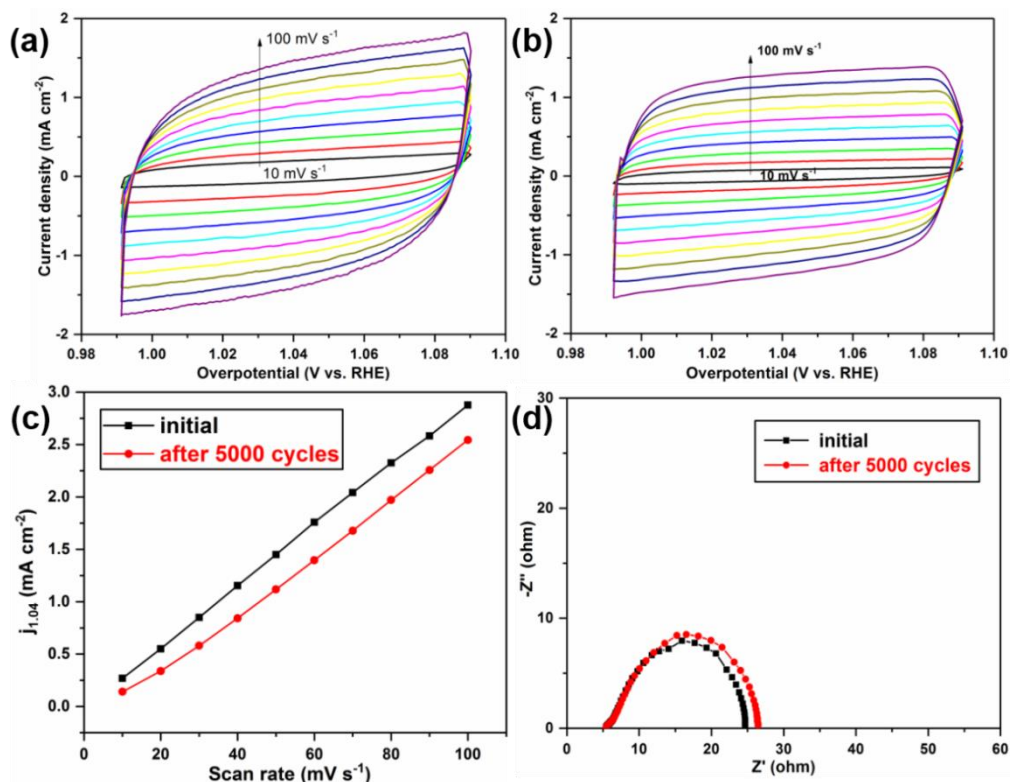

**Figure S50** (a) Cyclic voltammograms, double-layer capacitances (b) and impedance spectroscopies (c) of BNFC-800 before and after 5000 potential cycles.

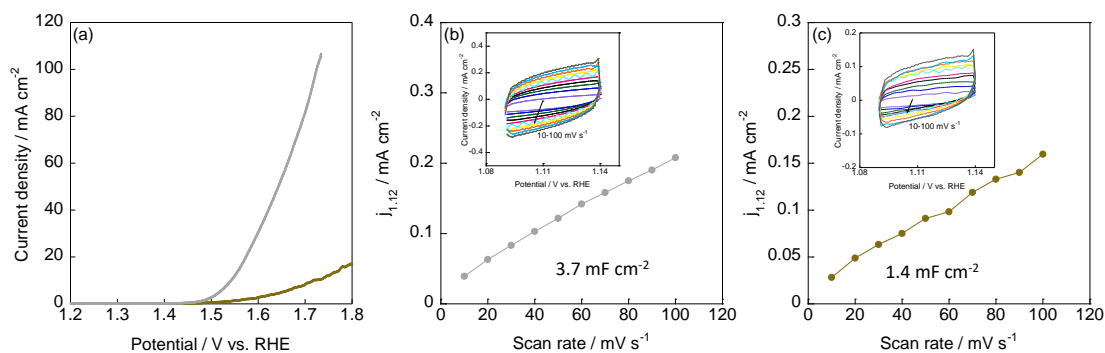

**Figure S51** (a) Cyclic voltammetry curves and double-layer capacitances (b) of IrO<sub>2</sub> before and after 1000 potential cycles.

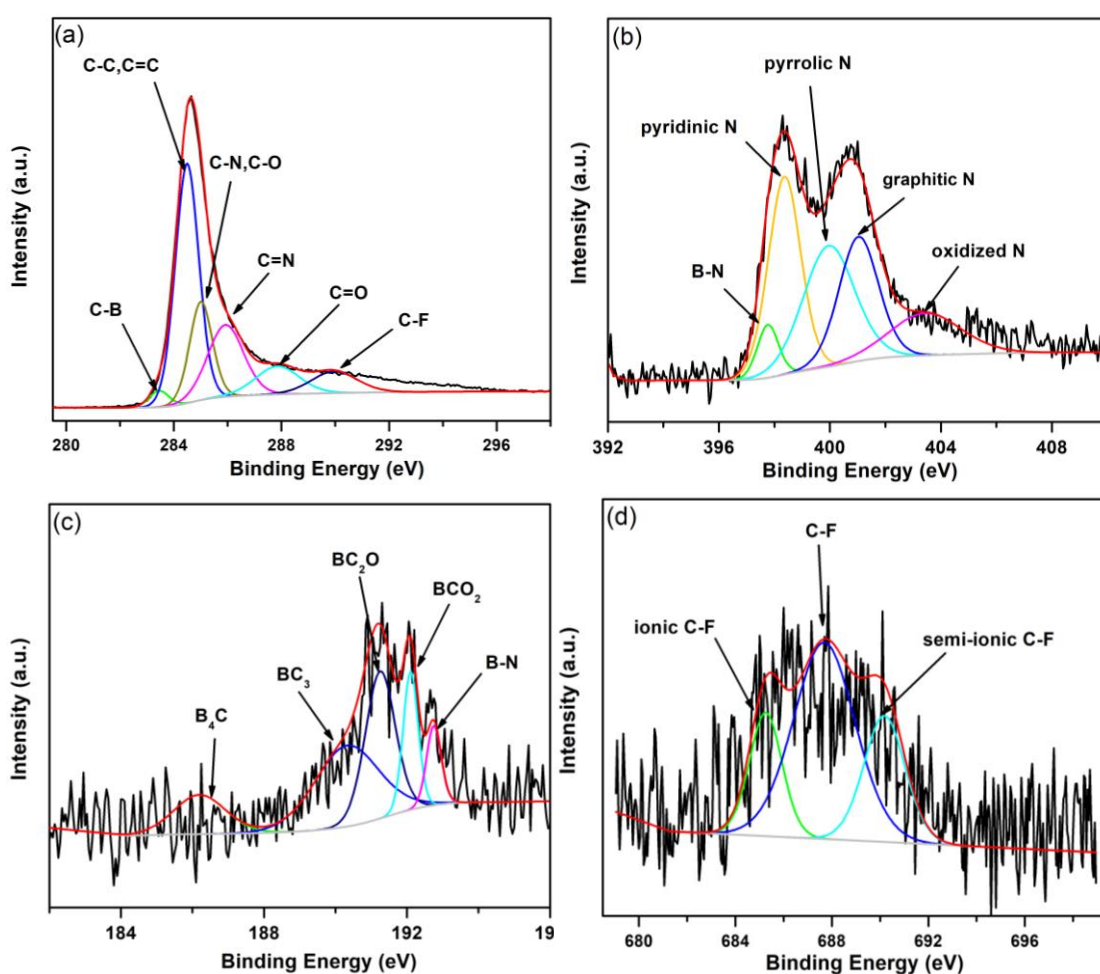

**Figure S52** Deconvoluted C1s (a), N1s (b), B1s (c) and F1s (d) peaks of BNFC-800 after 10 h OER catalysis in 1 M KOH electrolyte.

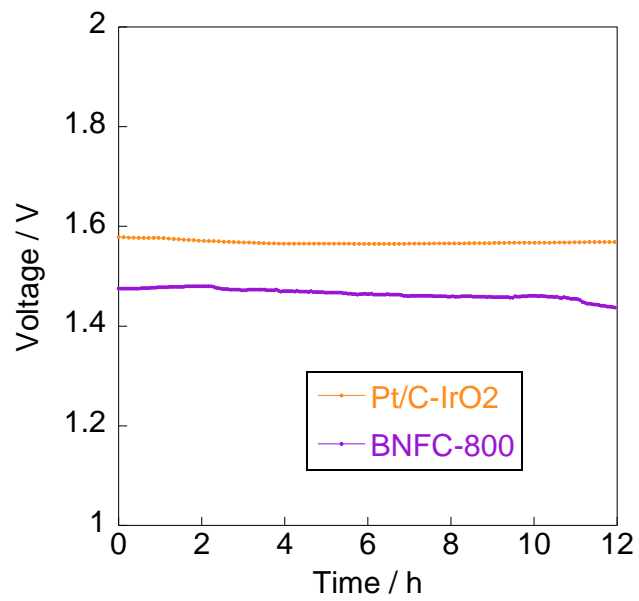

**Figure S53** OCV test of Pt/C-IrO<sub>2</sub> and BNFC-800 based ZABs.
